# Supplementary material for: Iron(iii)-catalyzed chelation assisted remote C–H bond oxygenation of 8-amidoquinolines
Source: Royal Society of Chemistry journal article supplement (doi:10.1039/c7ob02159c), 2017-01-01
Supplement: c7ob02159c1.pdf [file c7ob02159c1.pdf]

## **Iron (III)-catalyzed chelation assisted remote C-H bond oxygenation of 8-amidoquinolines.**

**Botla Vinayak, Pilli NavyaSree and Malapaka Chandrasekharam\***

I&PC Division, CSIR-Indian Institute of Chemical Technology, Hyderabad, India.

---

### **Table of Contents**

|                                                               |               |
|---------------------------------------------------------------|---------------|
| <b>1. Optimization of Reaction Conditions-----</b>            | <b>S2-S3</b>  |
| <b>Table S1. Optimization of the catalysts.....</b>           | <b>S2</b>     |
| <b>Table S2. Optimization of the Benzoylation Source.....</b> | <b>S2</b>     |
| <b>Table S3. Optimization of the solvents .....</b>           | <b>S3</b>     |
| <b>2. Crystallographic Data of Compound 2g -----</b>          | <b>S3-S4</b>  |
| <b>4. Copies of NMR Spectra Data-----</b>                     | <b>S5-S38</b> |

# 1. Optimization of Reaction Conditions:

**Table S1.** Optimization of the catalyst<sup>[a]</sup>

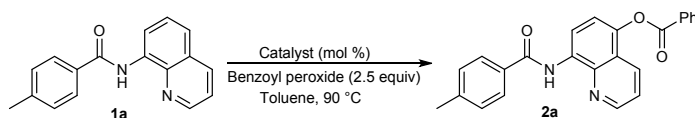

| Entry          | Catalyst (mol %)                          | Yield <sup>[b]</sup> |
|----------------|-------------------------------------------|----------------------|
| 1              | FeCl <sub>3</sub> ·6H <sub>2</sub> O (10) | 55                   |
| 2              | FeCl <sub>3</sub> ·6H <sub>2</sub> O (30) | 52                   |
| 3 <sup>c</sup> | FeCl <sub>3</sub> ·6H <sub>2</sub> O (20) | 61                   |
| 4 <sup>d</sup> | FeCl <sub>3</sub> ·6H <sub>2</sub> O (20) | 59                   |
| 5 <sup>e</sup> | FeCl <sub>3</sub> ·6H <sub>2</sub> O (20) | 54                   |
| 6              | Cu(OAc) <sub>2</sub> (20)                 | 40                   |
| 7              | CuBr <sub>2</sub> (20)                    | 43                   |
| 8              | CuCl <sub>2</sub> (20)                    | 21                   |
| 9              | Cu(OTf) <sub>2</sub> (20)                 | 28                   |
| 10             | CuI (20)                                  | 46                   |
| 11             | Pd (OAc) <sub>2</sub> (20)                | 00                   |
| 12             | PdCl <sub>2</sub> (20)                    | 00                   |

<sup>[a]</sup> The reaction was performed with **1a** (1.0 mmol), Catalyst (mol %), Benzoyl peroxide (2.5 mmol, 5 × 0.5 equiv./0.5 h) in toluene (5 mL) stirred at 90 °C for 24 h in open air. <sup>[b]</sup> Isolated yields. <sup>[c]</sup> TBHP (2.0 mmol) as oxidant, <sup>[d]</sup> Under O<sub>2</sub> atmosphere, <sup>[e]</sup> Under N<sub>2</sub> atmosphere.

**Table S2.** Optimization of the Benzylation Source <sup>[a]</sup>

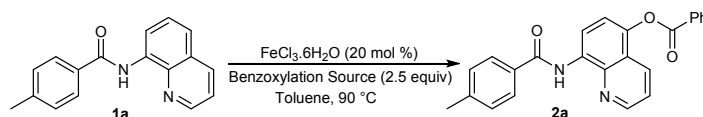

| Entry          | Benzylation Source | Yield <sup>[b]</sup> |
|----------------|--------------------|----------------------|
| 1              | Benzoyl peroxide   | 73                   |
| 2              | Benzoic acid       | 00                   |
| 3              | Benzoic anhydride  | 00                   |
| 4              | Benzoyl chloride   | 00                   |
| 5 <sup>c</sup> | Phenyl acetylene   | 00                   |
| 6 <sup>c</sup> | styrene            | 00                   |
| 7              | <i>m</i> -CPBA     | 00                   |

<sup>[a]</sup> The reaction was performed with **1a** (1.0 mmol), FeCl<sub>3</sub>·6H<sub>2</sub>O (0.2 mmol), Benzylation Source (2.5 mmol) in toluene (5 mL) stirred at 90 °C for 24 h in open air. <sup>[b]</sup> Isolated yields. <sup>[c]</sup> in the presence of TBHP, (*m*-CPBA = *meta*-chloro perbenzoic acid).

**Table S3.** Optimization of the Solvent<sup>[a]</sup>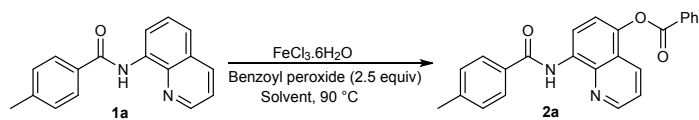

| Entry | Solvent          | Yield <sup>[b]</sup> |
|-------|------------------|----------------------|
| 1     | ACN              | 53                   |
| 2     | DCE              | 42                   |
| 3     | DMF              | 00                   |
| 4     | DMSO             | 00                   |
| 5     | Toluene          | 63                   |
| 6     | AcOH             | 00                   |
| 7     | MeOH             | 00                   |
| 8     | H <sub>2</sub> O | 00                   |

<sup>[a]</sup> The reaction was performed with **1a** (1.0 mmol),  $\text{FeCl}_3 \cdot 6\text{H}_2\text{O}$  (0.2 mmol), Benzoyl peroxide (2.5 mmol  $5 \times 0.5$  equiv./0.5 h) in Solvent (5 mL) stirred at (entry 1, 7) and remaining solvents were at  $90^\circ\text{C}$  for 24 h in open air. <sup>[b]</sup> Isolated yields.

## 2. Crystallographic Data of Compound 2g

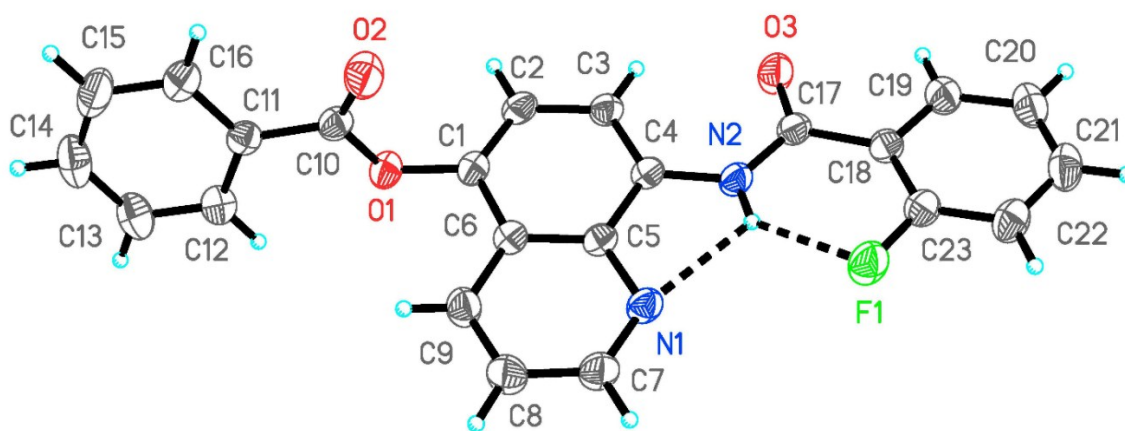

**Fig.1.** A view of BD71, showing the atom-labelling scheme. Displacement ellipsoids are drawn at the 30% probability level and H atoms are represented by circles of arbitrary radii. Intramolecular hydrogen bonds are shown as dashed lines.

X-ray data for the compound BE52 was collected at room temperature on a Bruker Smart Apex CCD diffractometer with graphite monochromated MoK $\alpha$  radiation ( $\lambda=0.71073\text{\AA}$ ) with  $\omega$ -scan method. Data for the compound KA172 was also collected at room temperature on a Bruker D8 QUEST instrument with an I $\mu$ S Mo microsource ( $\lambda = 0.7107\text{\AA}$ ) and a PHOTON-100 detector. Integration and scaling of intensity data of BD71 was accomplished using SAINT program.<sup>1</sup> The structure was solved by direct methods using SHELXS<sup>2</sup> and refinement was carried out by full-matrix least-squares technique using SHELXL.<sup>2</sup>

**Crystal Data for 2g:** C<sub>23</sub>H<sub>15</sub>N<sub>2</sub>O<sub>3</sub>F ( $M=386.39\text{ g/mol}$ ): triclinic, space group P-1 (no. 2),  $a = 8.1396(11)\text{\AA}$ ,  $b = 9.5365(13)\text{\AA}$ ,  $c = 13.2564(18)\text{\AA}$ ,  $\alpha = 108.241(2)^\circ$ ,  $\beta = 99.899(2)^\circ$ ,  $\gamma = 103.051(2)^\circ$ ,  $V = 918.7(2)\text{\AA}^3$ ,  $Z = 2$ ,  $T = 294.15\text{ K}$ ,  $\mu(\text{Mo K}\alpha) = 0.101\text{ mm}^{-1}$ ,  $D_{\text{calc}} = 1.3966\text{ g/cm}^3$ , 10638 reflections measured ( $4.68^\circ \leq 2\theta \leq 50^\circ$ ), 3226 unique ( $R_{\text{int}} = 0.0249$ ,  $R_{\text{sigma}} = 0.0339$ ) which were used in all calculations. The final  $R_1$  was 0.0593 ( $I > 2\sigma(I)$ ) and  $wR_2$  was 0.1375 (all data). CCDC 1559198 contains supplementary Crystallographic data for the structure. These data can be obtained free of charge at [www.ccdc.cam.ac.uk/conts/retrieving.html](http://www.ccdc.cam.ac.uk/conts/retrieving.html) [or from the Cambridge Crystallographic Data Centre (CCDC), 12 Union Road, Cambridge CB2 1EZ, UK; fax: +44(0) 1223 336 033; email: [deposit@ccdc.cam.ac.uk](mailto:deposit@ccdc.cam.ac.uk)].

1. Bruker (2001). SAINT (Version 6.28a) & SMART (Version 5.625). Bruker AXS Inc., Madison, Wisconsin, USA.
2. Sheldrick G. M. (2015) Acta Crystallogr C71: 3-8.
3. Bruker (2016). APEX3, SAINT and SADABS. Bruker AXS, Inc., Madison, Wisconsin, USA.



### 3. Copies of NMR Spectral Data

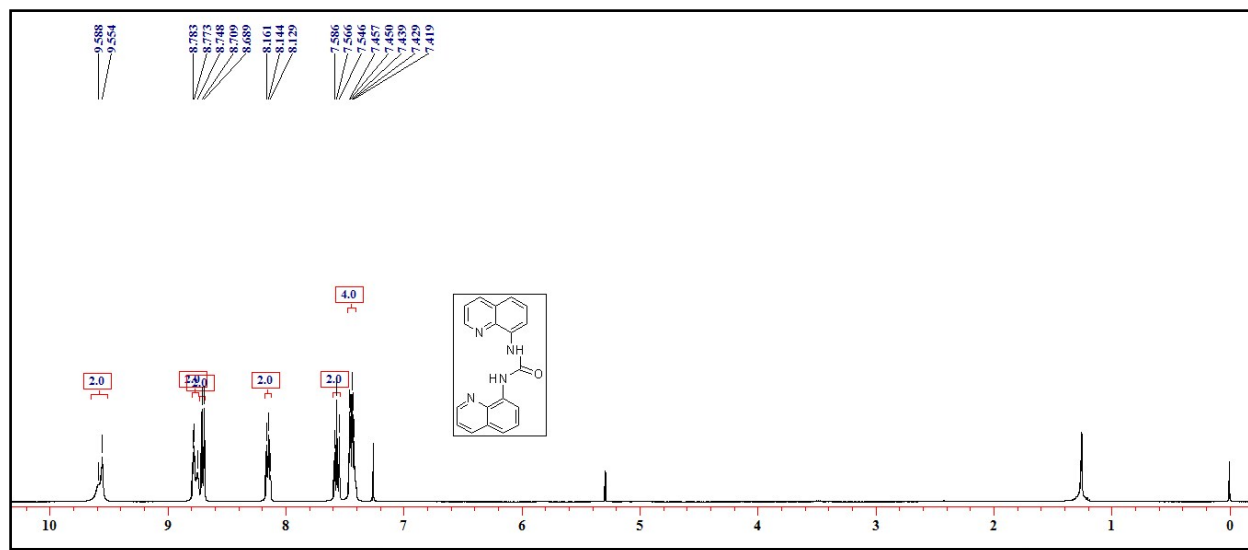

Figure S1. <sup>1</sup>H NMR spectrum of **1y** in CDCl<sub>3</sub> + CD<sub>2</sub>Cl<sub>2</sub>.

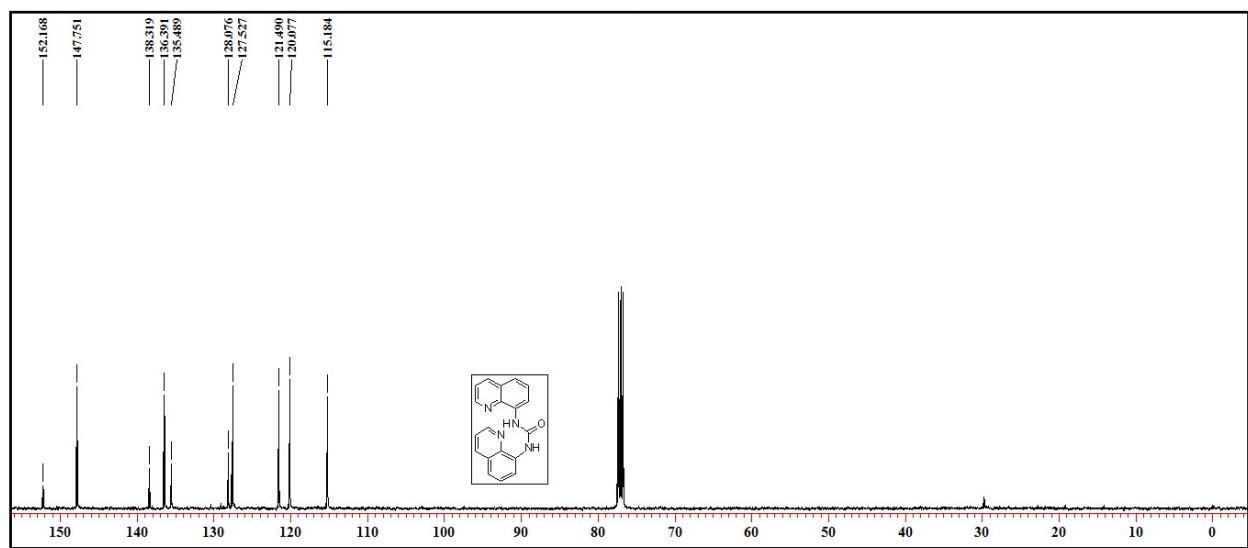

Figure S2. <sup>13</sup>C NMR spectrum of **1y** in CDCl<sub>3</sub>.

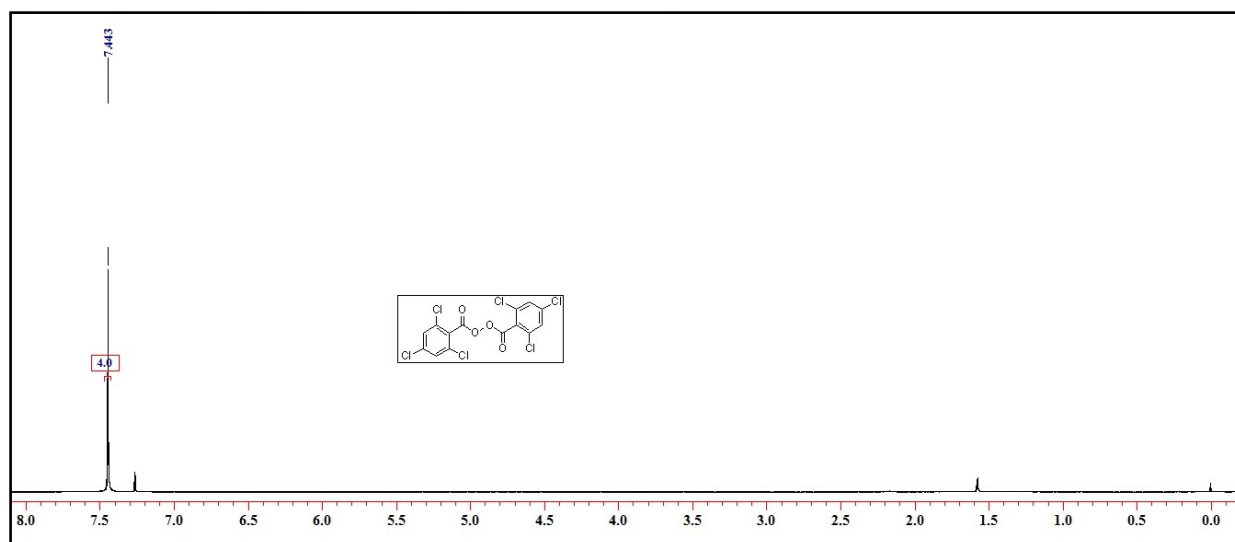

Figure S3.  $^1\text{H}$  NMR spectrum of **1ae** in  $\text{CDCl}_3$ .

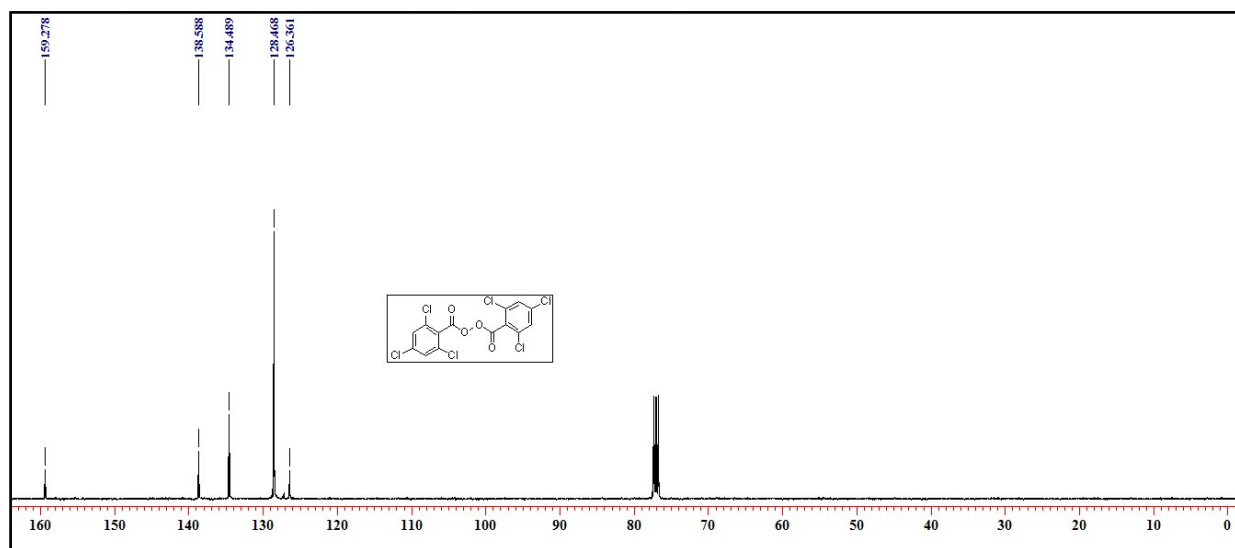

Figure S4.  $^{13}\text{C}$  NMR spectrum of **1ae** in  $\text{CDCl}_3$ .

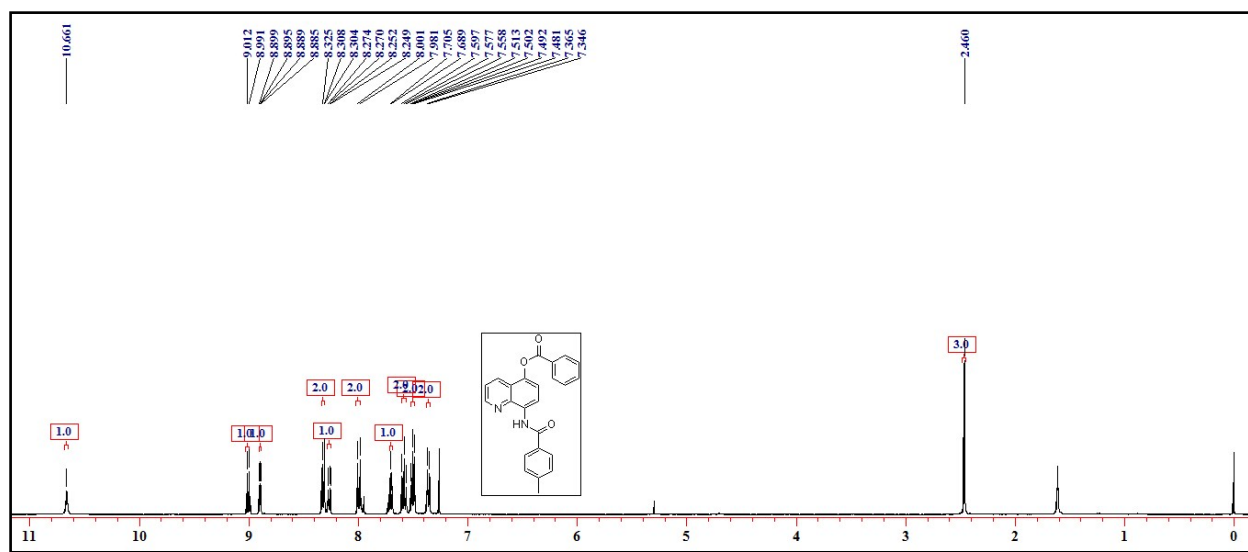

Figure S5. <sup>1</sup>H NMR spectrum of **2a** in CDCl<sub>3</sub> + CD<sub>2</sub>Cl<sub>2</sub>.

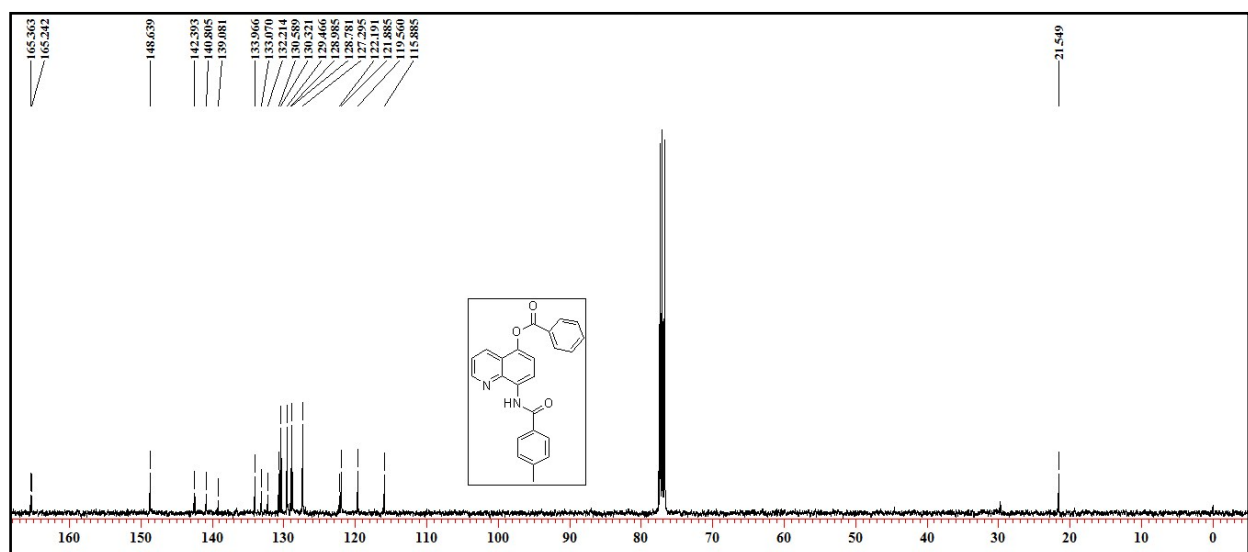

Figure S6. <sup>13</sup>C NMR spectrum of **2a** in CDCl<sub>3</sub>.

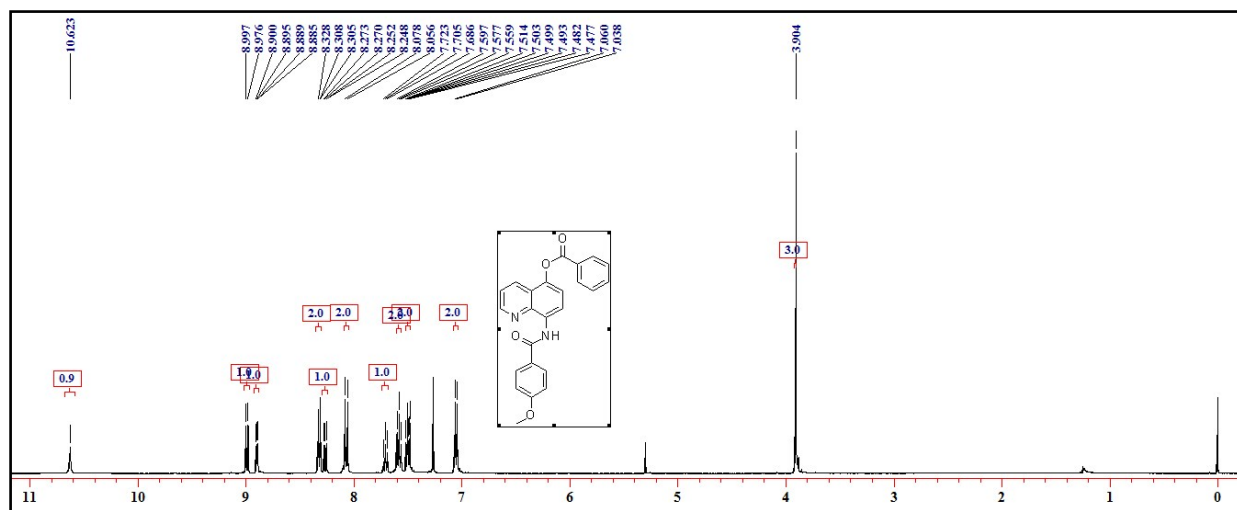

Figure S7. <sup>1</sup>H NMR spectrum of **2b** in CDCl<sub>3</sub> + CD<sub>2</sub>Cl<sub>2</sub>.

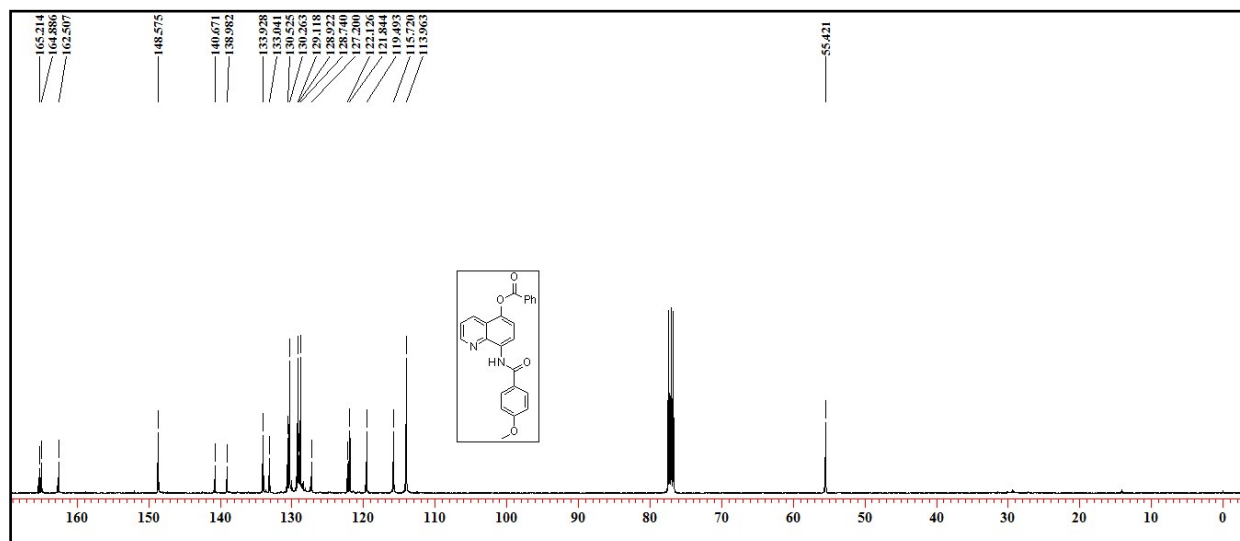

Figure S8. <sup>13</sup>C NMR spectrum of **2b** in CDCl<sub>3</sub>.

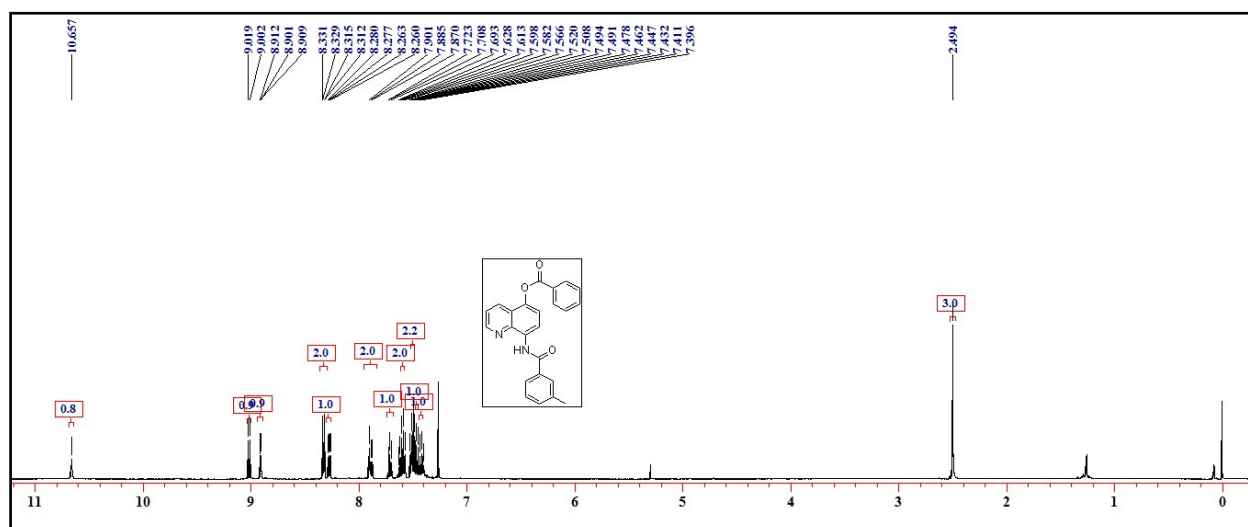

Figure S9. <sup>1</sup>H NMR spectrum of **2c** in CDCl<sub>3</sub>+CD<sub>2</sub>Cl<sub>2</sub>.

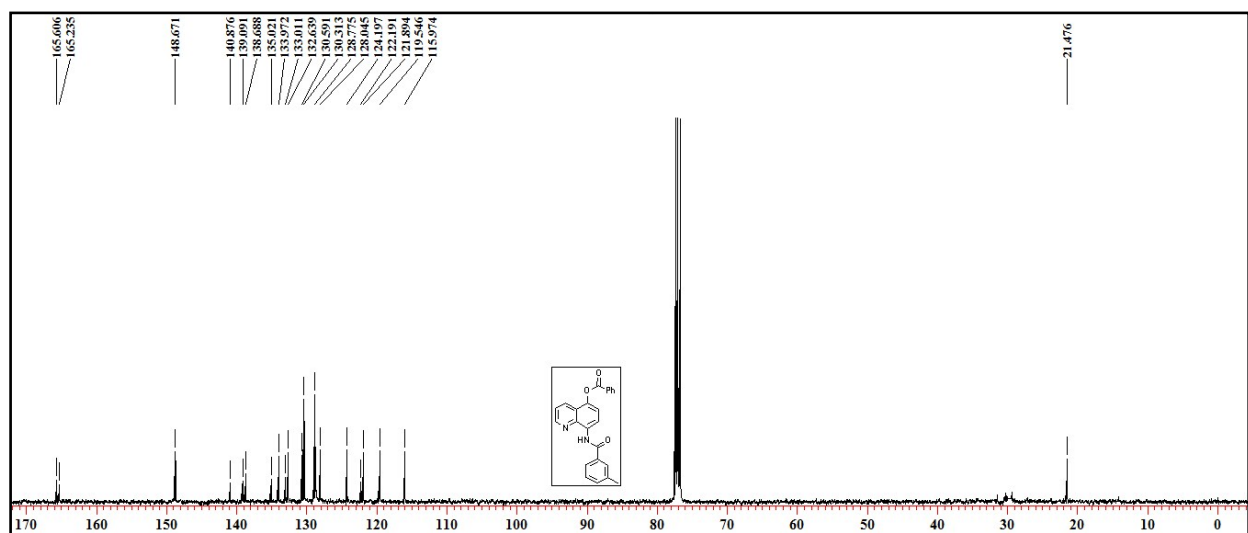

Figure S10. <sup>13</sup>C NMR spectrum of **2c** in CDCl<sub>3</sub>.

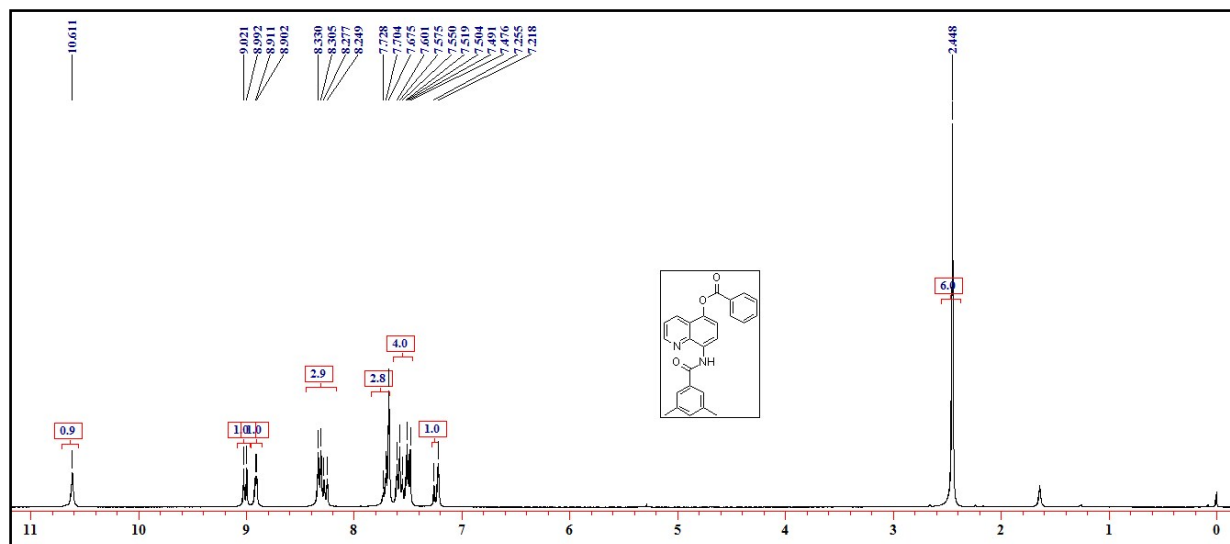

Figure S11. <sup>1</sup>H NMR spectrum of **2d** in CDCl<sub>3</sub>.

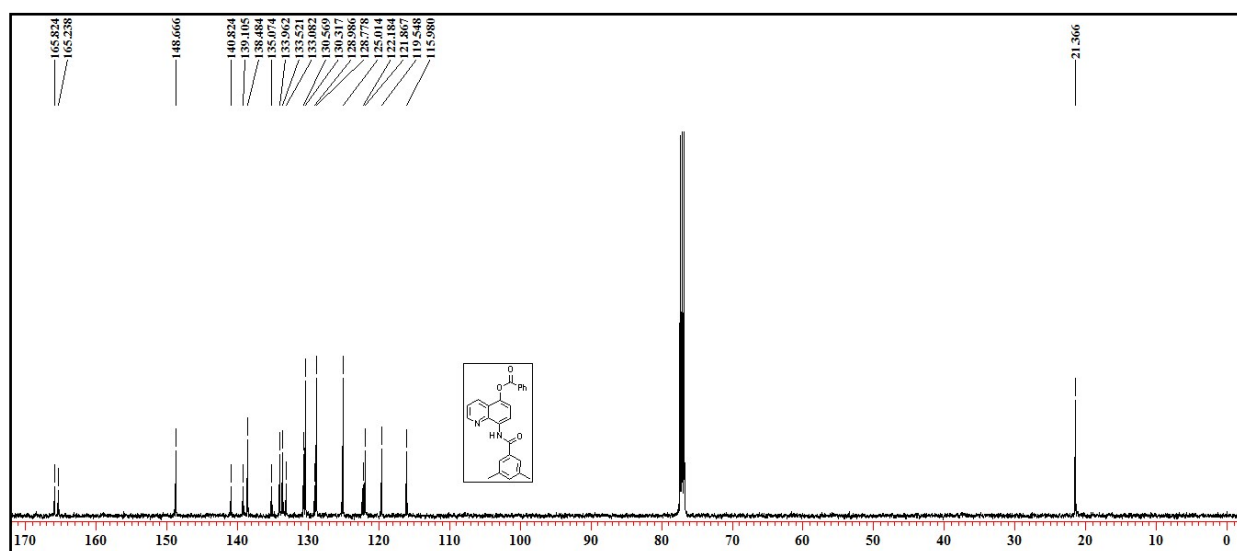

Figure S12. <sup>13</sup>C NMR spectrum of **2d** in CDCl<sub>3</sub>.

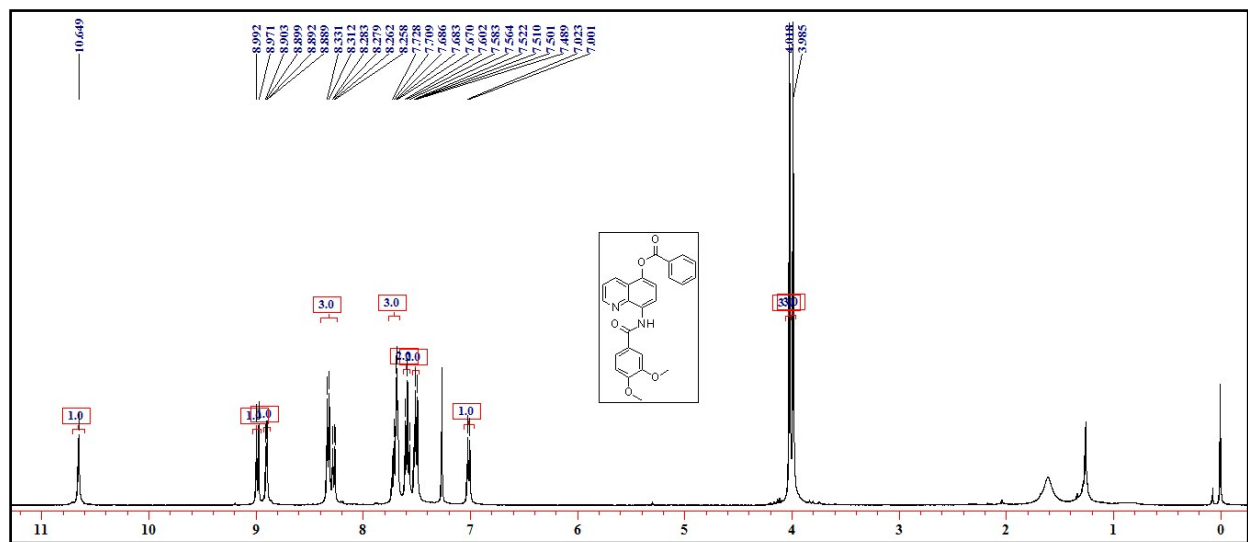

Figure S13. <sup>1</sup>H NMR spectrum of **2e** in CDCl<sub>3</sub>.

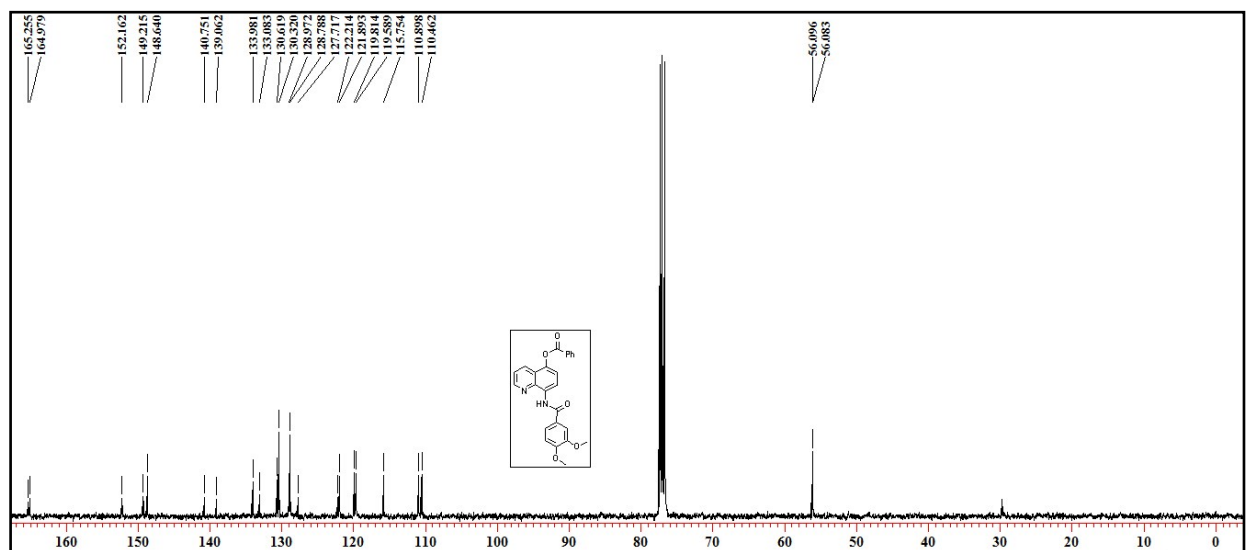

Figure S14. <sup>13</sup>C NMR spectrum of **2e** in CDCl<sub>3</sub>.

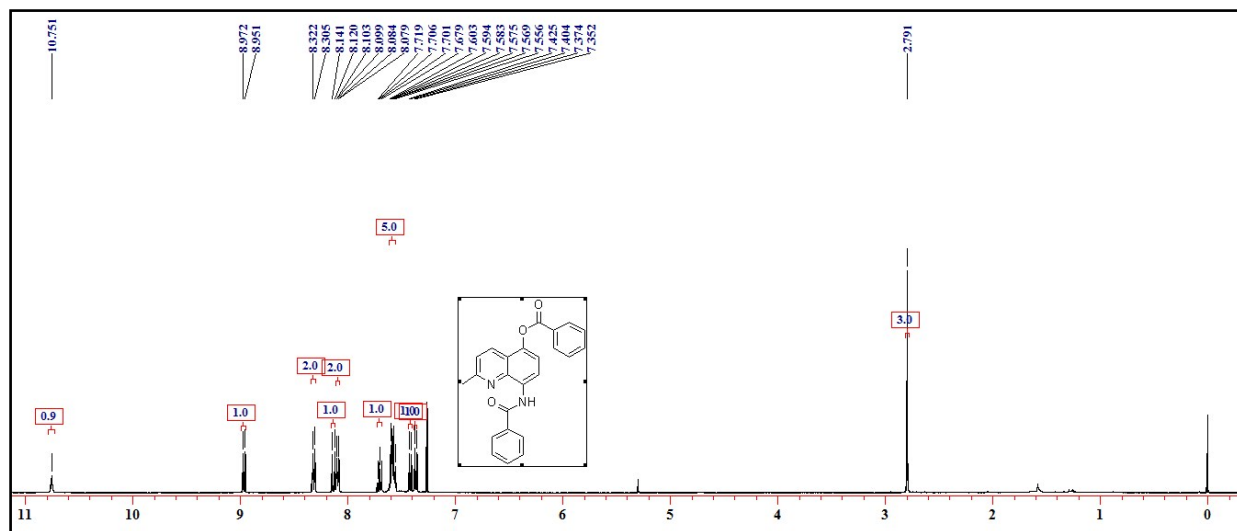

Figure S15. <sup>1</sup>H NMR spectrum of **2f** in CDCl<sub>3</sub> + CD<sub>2</sub>Cl<sub>2</sub>.

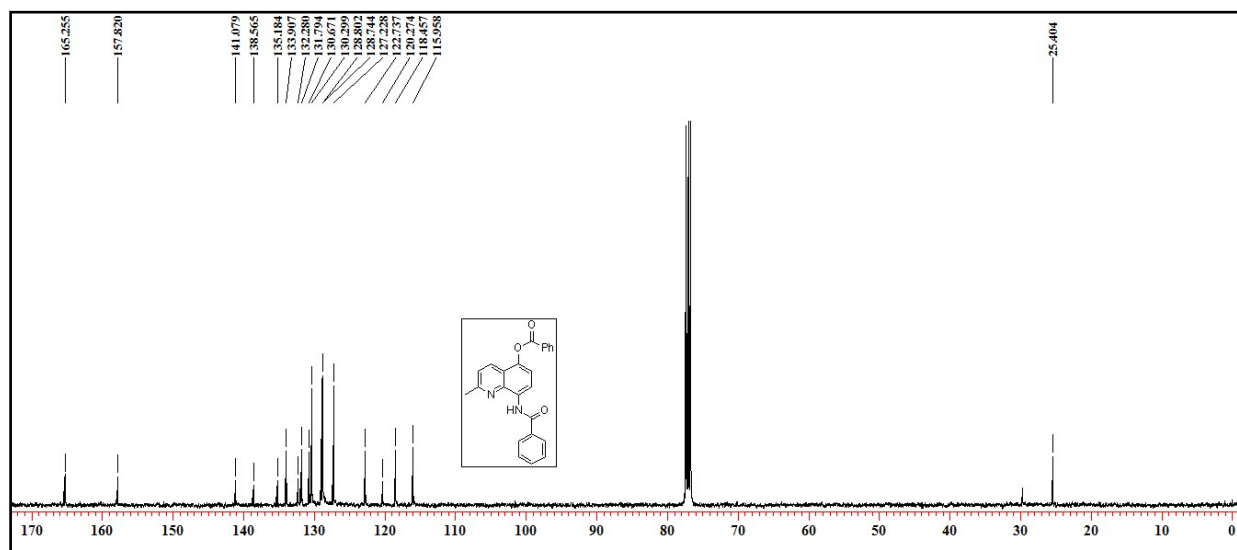

Figure S16. <sup>13</sup>C NMR spectrum of **2f** in CDCl<sub>3</sub>.



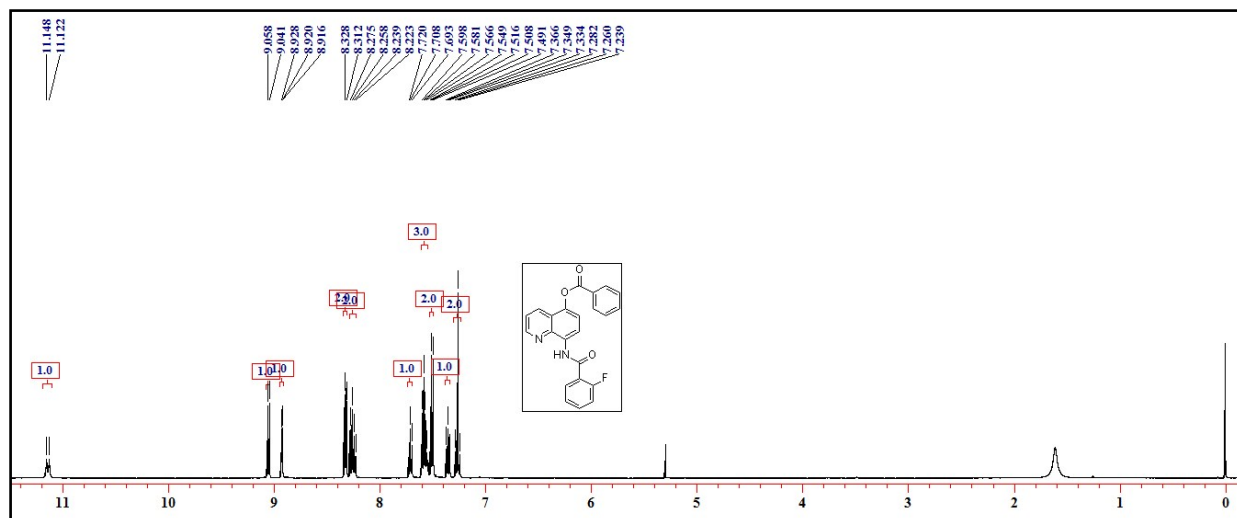

Figure S17. <sup>1</sup>H NMR spectrum of **2g** in CDCl<sub>3</sub> + CD<sub>2</sub>Cl<sub>2</sub>.

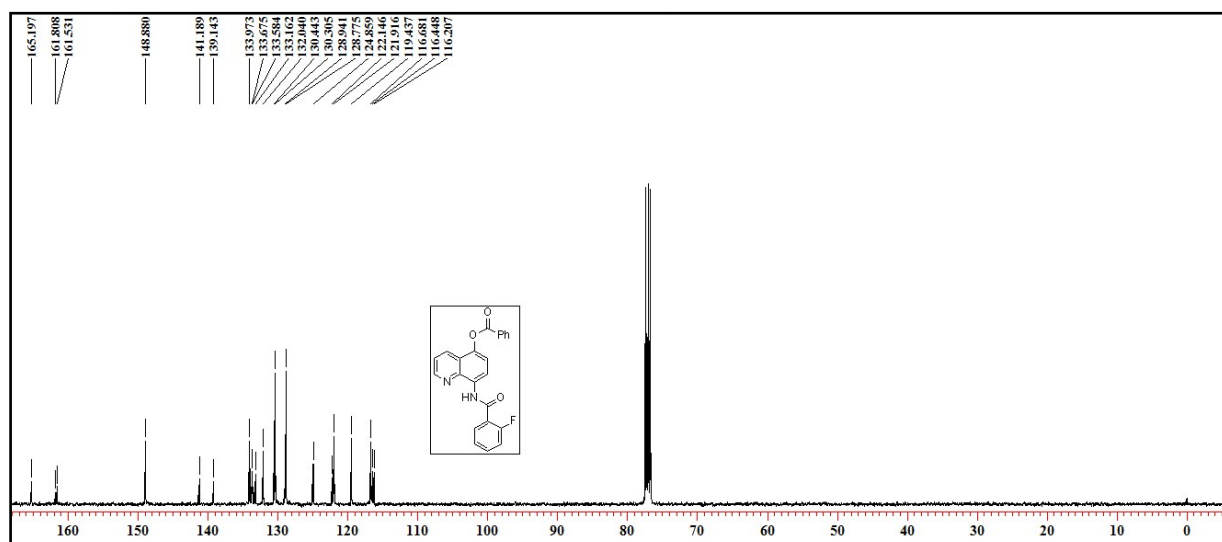

Figure S18. <sup>13</sup>C NMR spectrum of **2g** in CDCl<sub>3</sub>.

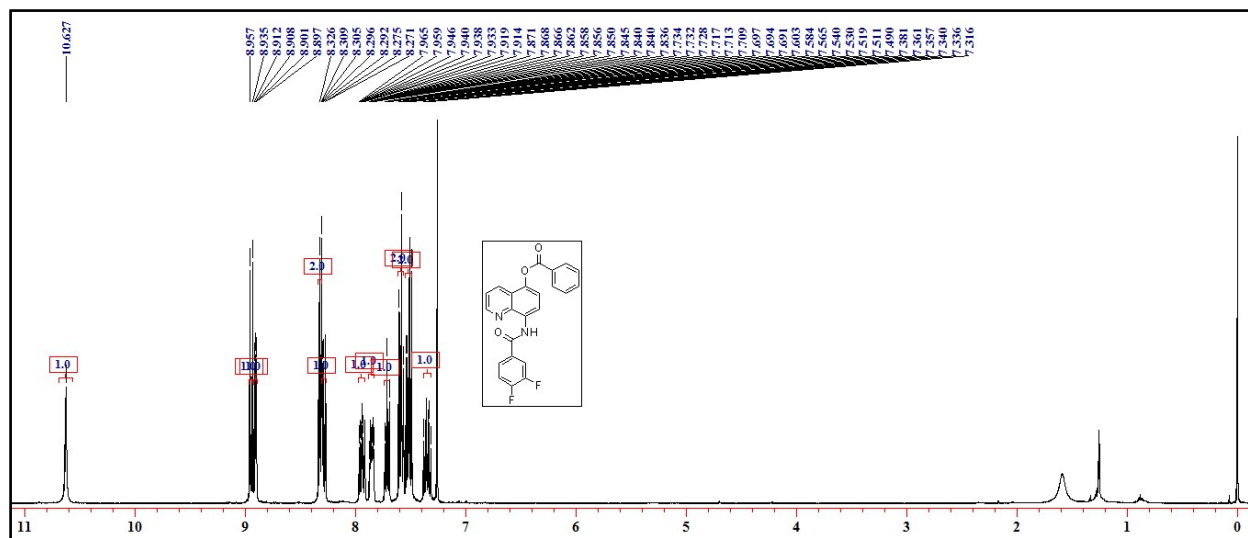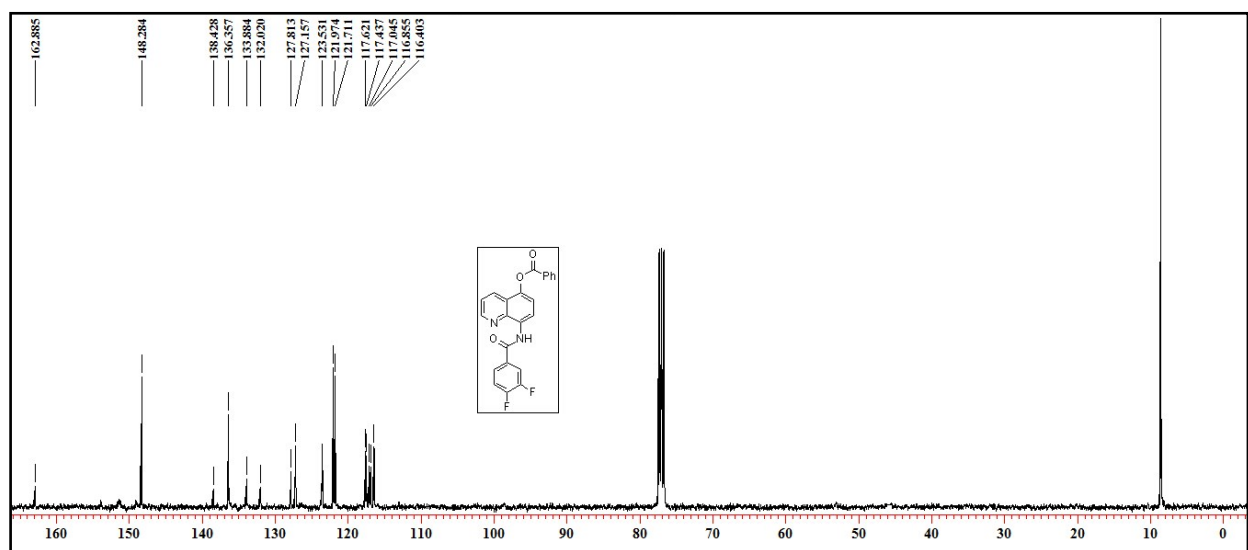

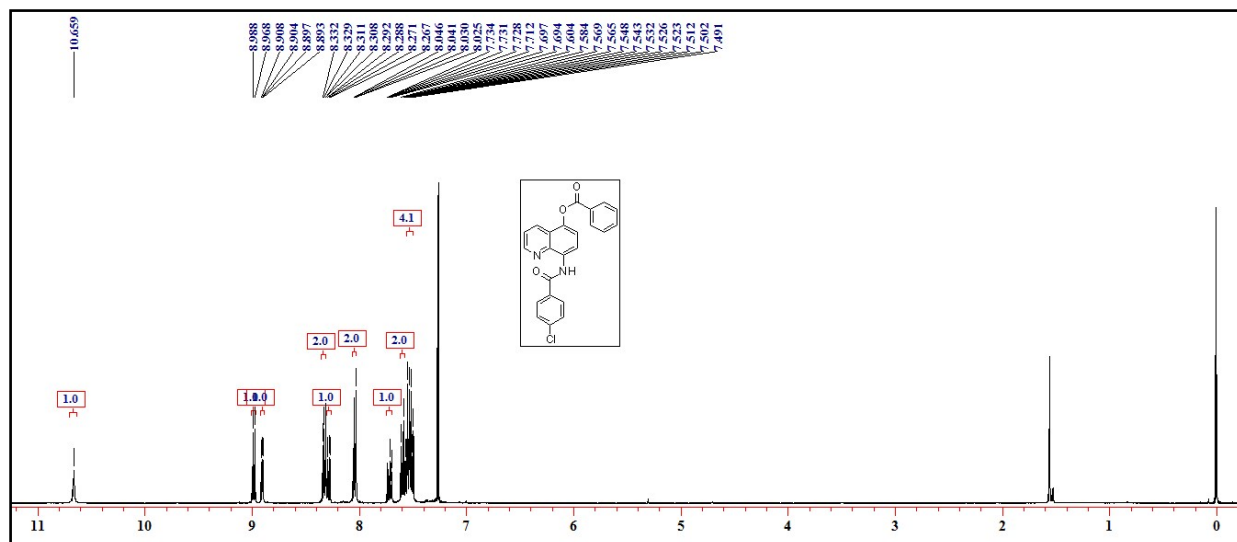

Figure S21. <sup>1</sup>H NMR spectrum of **2i** in CDCl<sub>3</sub>.

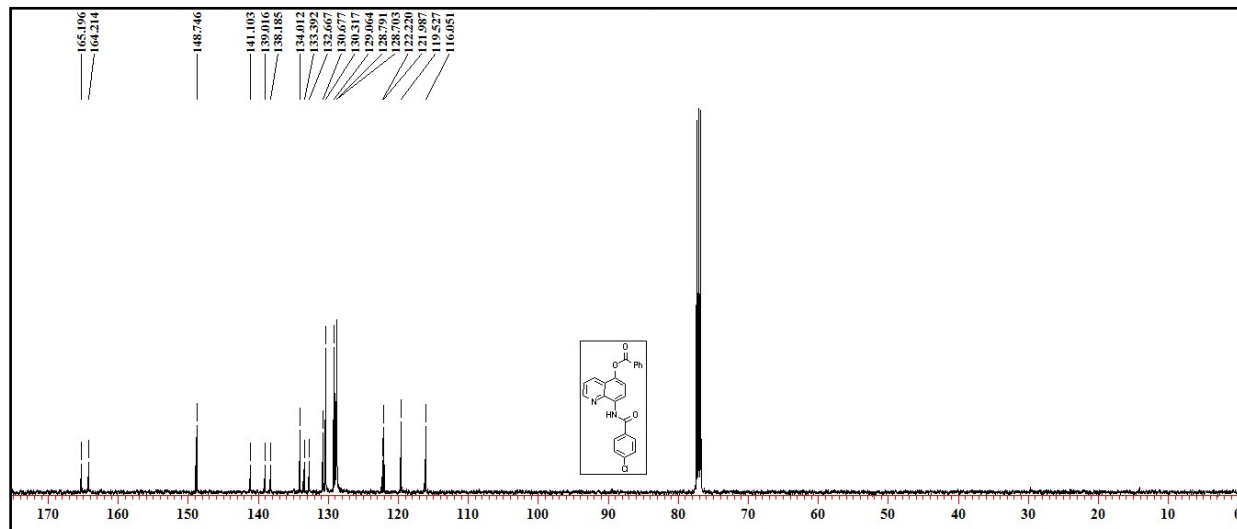

Figure S22. <sup>13</sup>C NMR spectrum of **2i** in CDCl<sub>3</sub>.

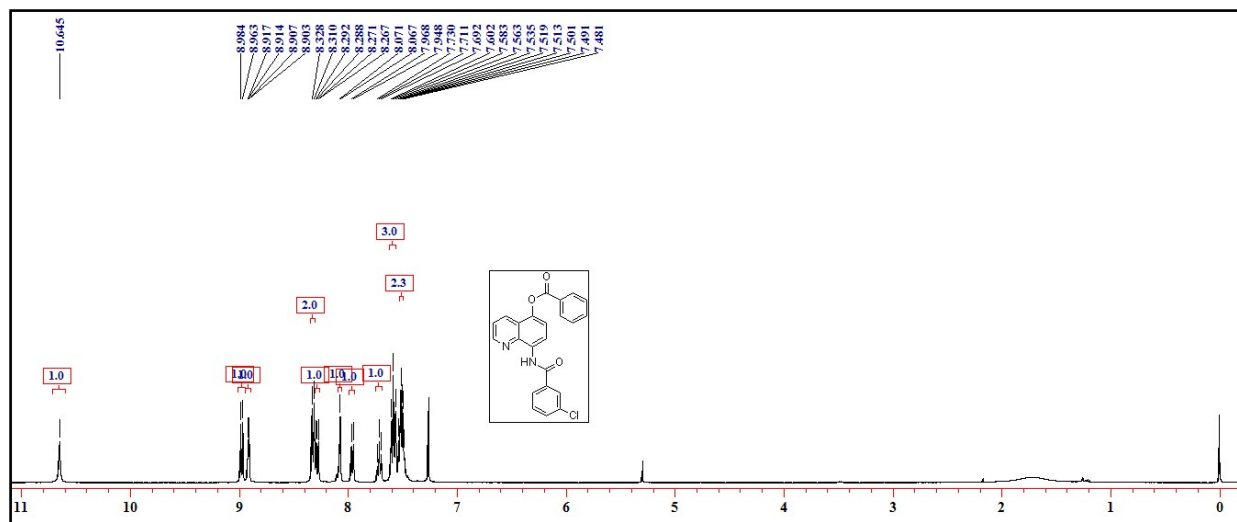

Figure S23. <sup>1</sup>H NMR spectrum of **2j** in CDCl<sub>3</sub> + CD<sub>2</sub>Cl<sub>2</sub>.

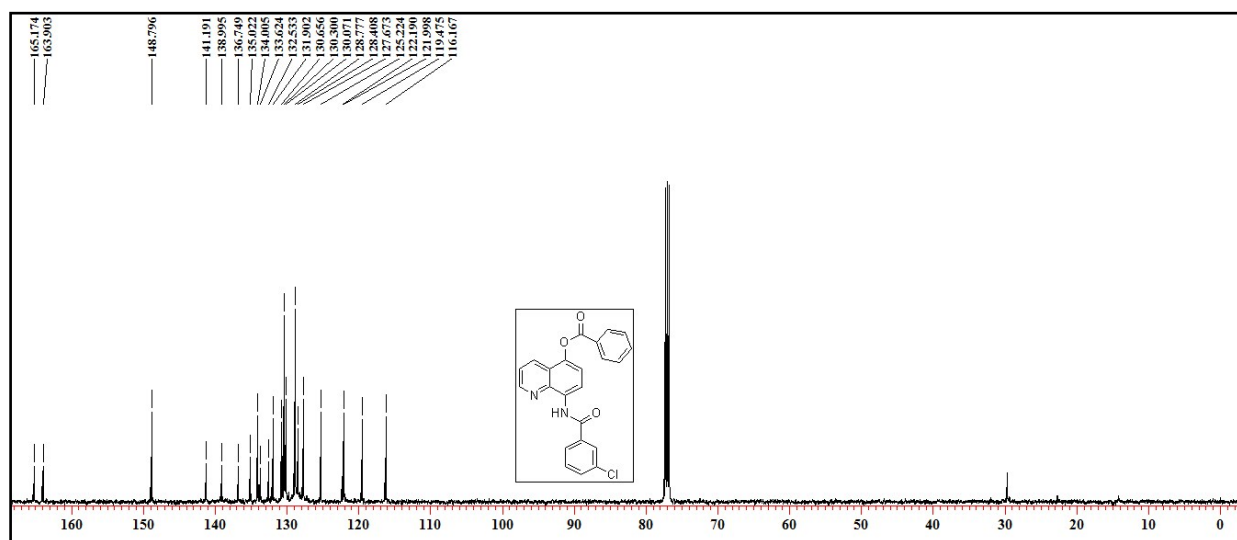

Figure S24. <sup>13</sup>C NMR spectrum of **2j** in CDCl<sub>3</sub>.

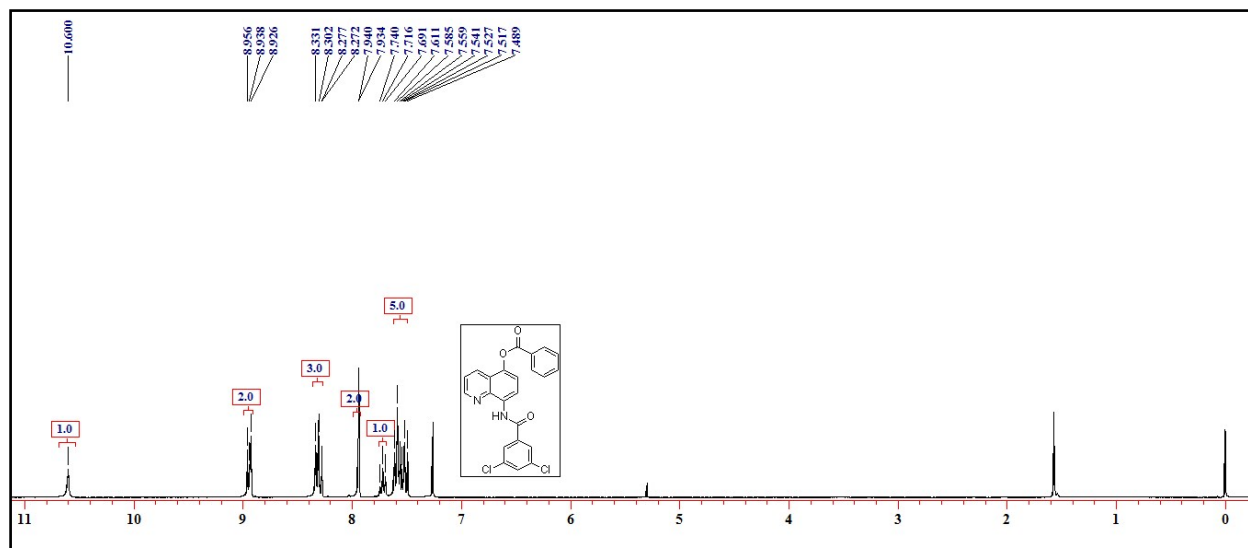

Figure S25. <sup>1</sup>H NMR spectrum of **2k** in CDCl<sub>3</sub> + CD<sub>2</sub>Cl<sub>2</sub>.

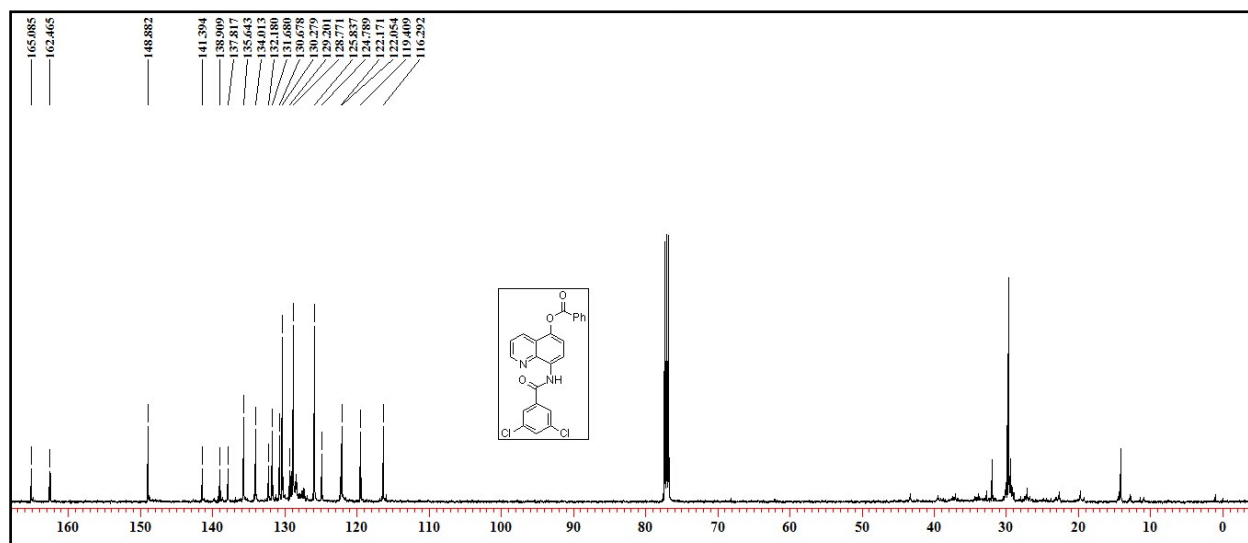

Figure S26. <sup>13</sup>C NMR spectrum of **2k** in CDCl<sub>3</sub>.

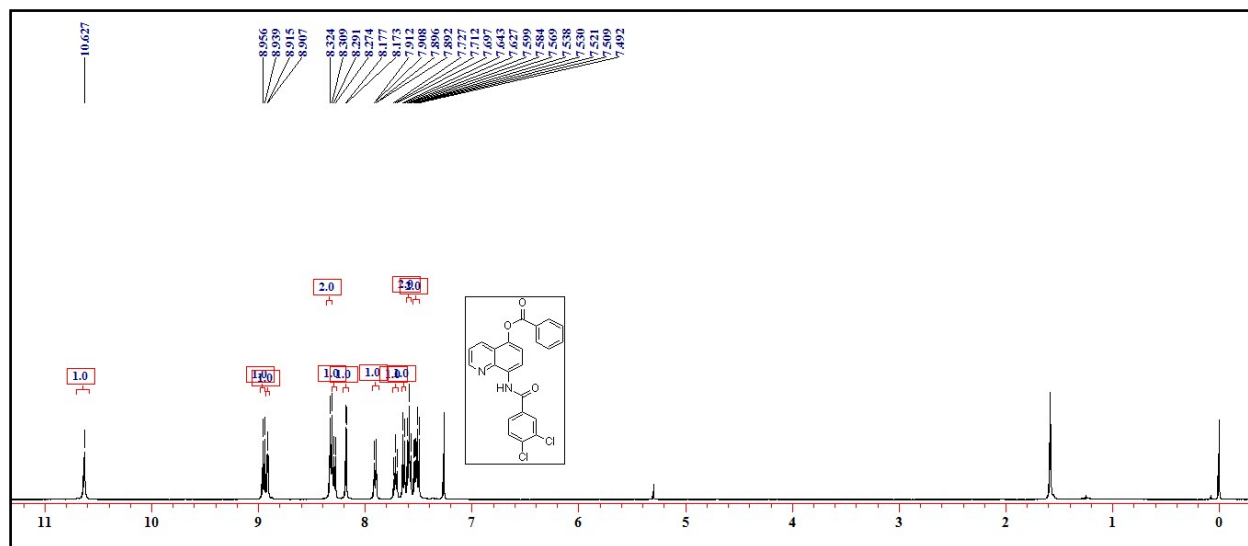

Figure S27.  $^1\text{H}$  NMR spectrum of **21** in  $\text{CDCl}_3+\text{CD}_2\text{Cl}_2$ .

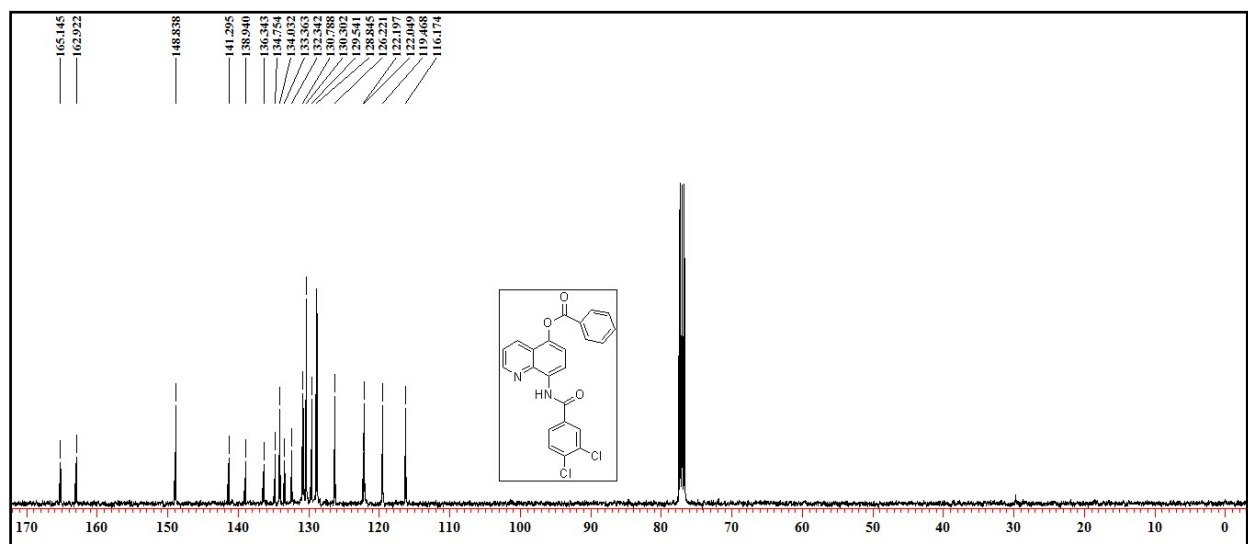

Figure S28.  $^{13}\text{C}$  NMR spectrum of **2l** in  $\text{CDCl}_3$ .

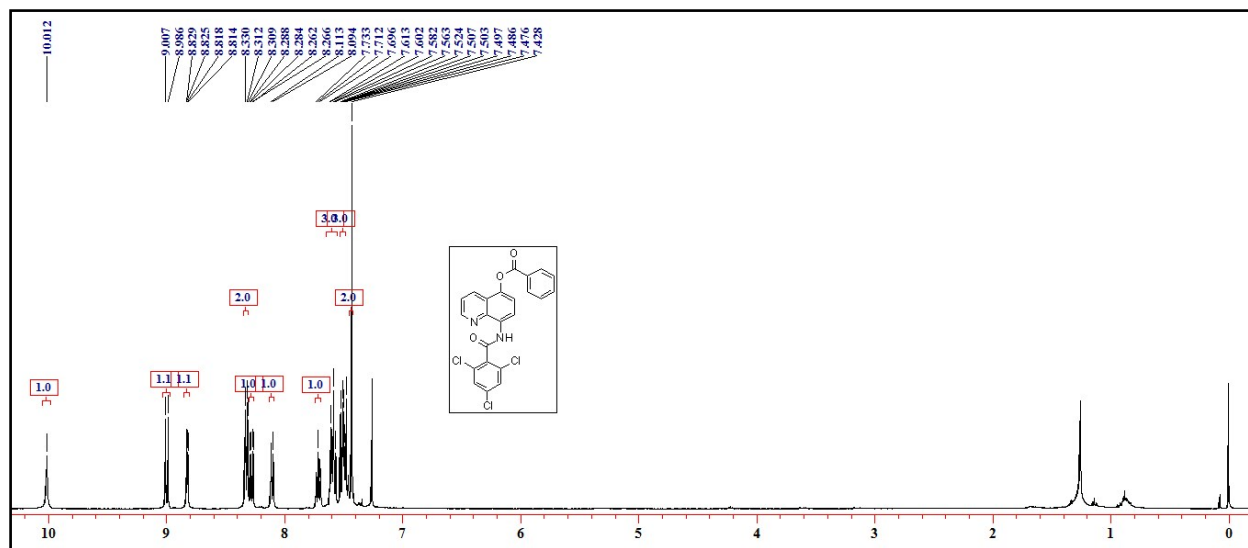

Figure S29. <sup>1</sup>H NMR spectrum of **2m** in CDCl<sub>3</sub>.

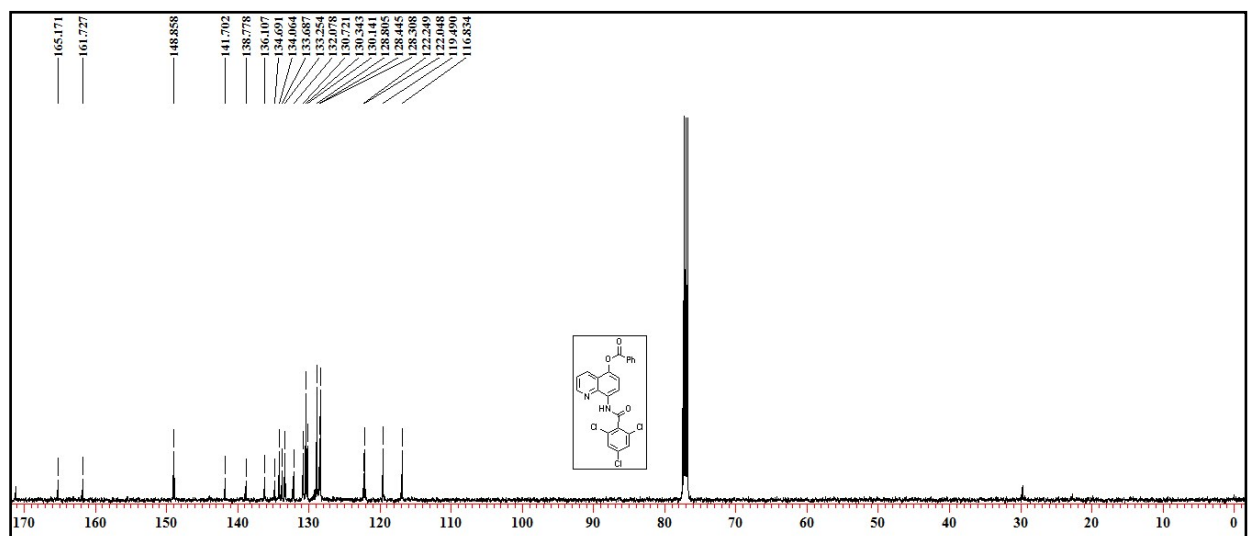

Figure S30. <sup>13</sup>C NMR spectrum of **2m** in CDCl<sub>3</sub>.

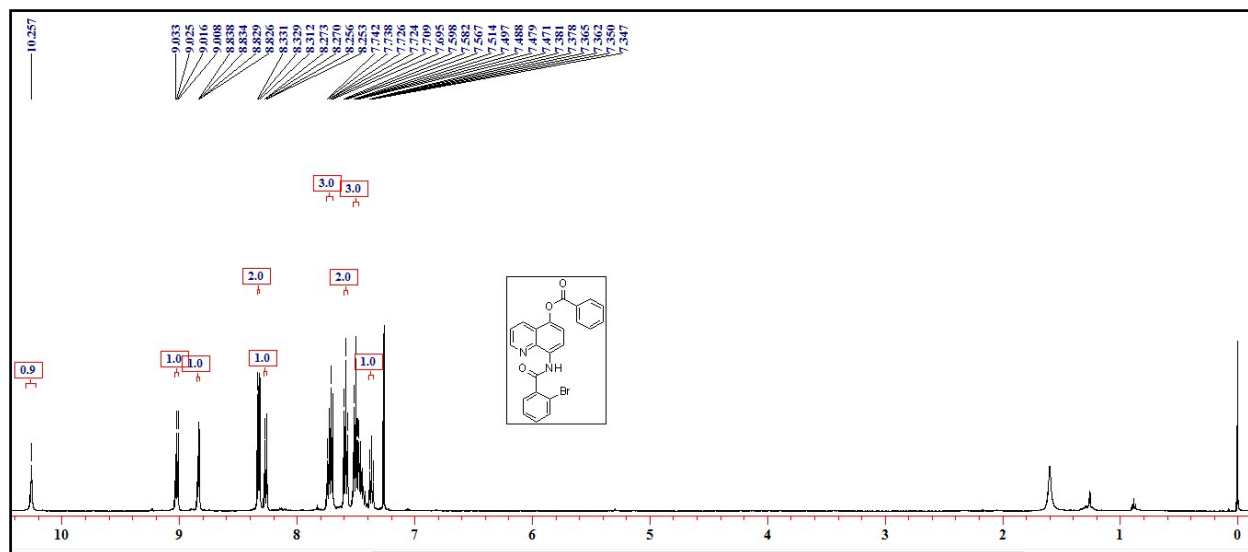

Figure S31. <sup>1</sup>H NMR spectrum of **2n** in CDCl<sub>3</sub>.

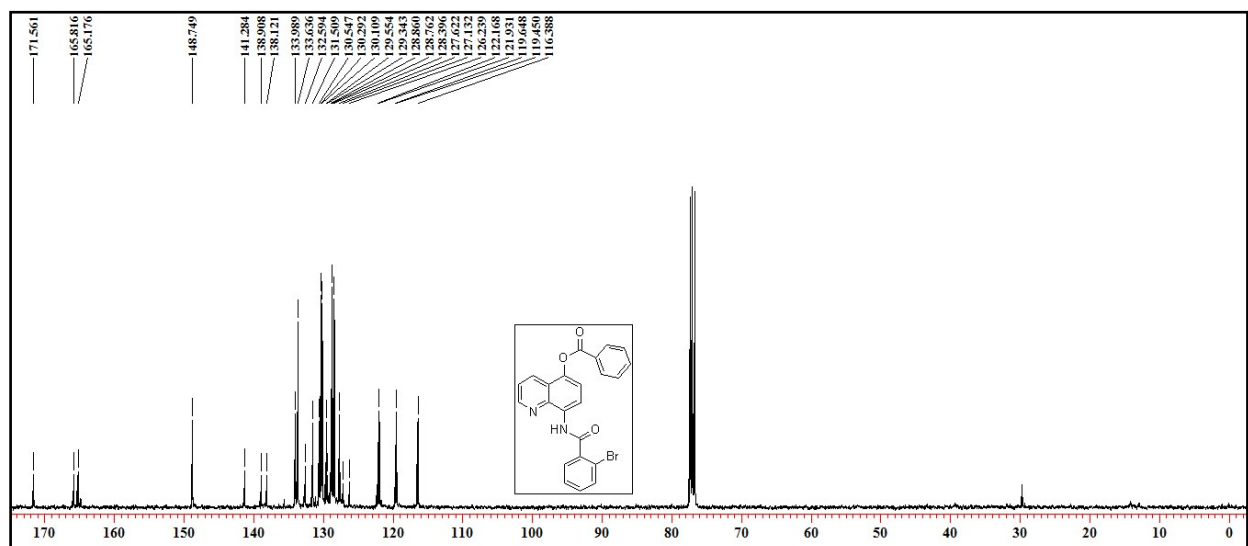

Figure S32. <sup>13</sup>C NMR spectrum of **2n** in CDCl<sub>3</sub>.



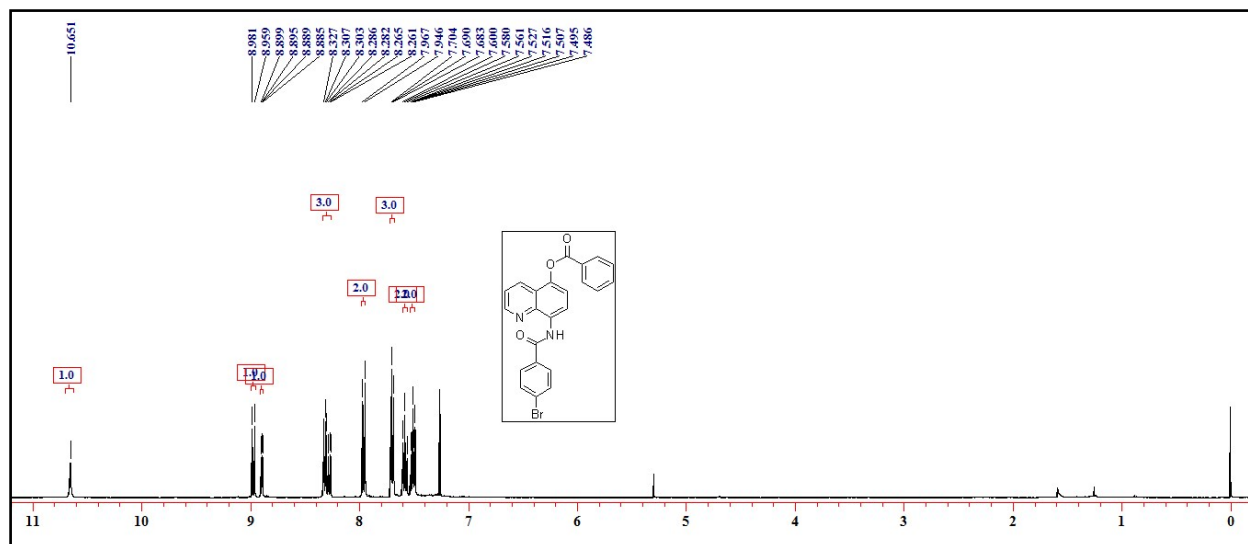

Figure S33. <sup>1</sup>H NMR spectrum of **2o** in CDCl<sub>3</sub>+ CD<sub>2</sub>Cl<sub>2</sub>.

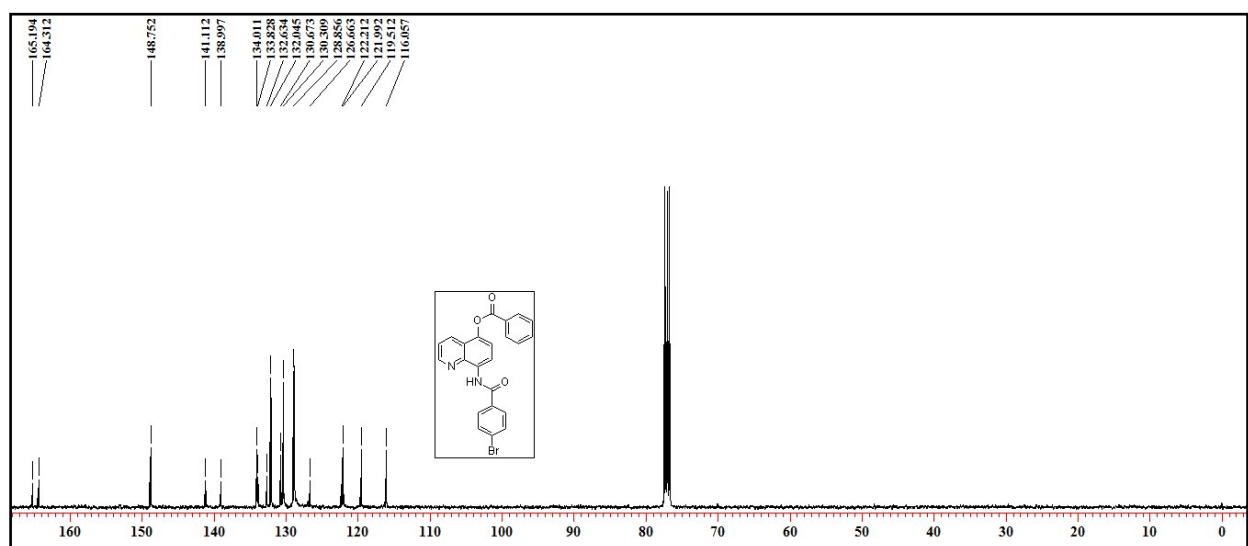

Figure S34. <sup>13</sup>C NMR spectrum of **2o** in CDCl<sub>3</sub>.

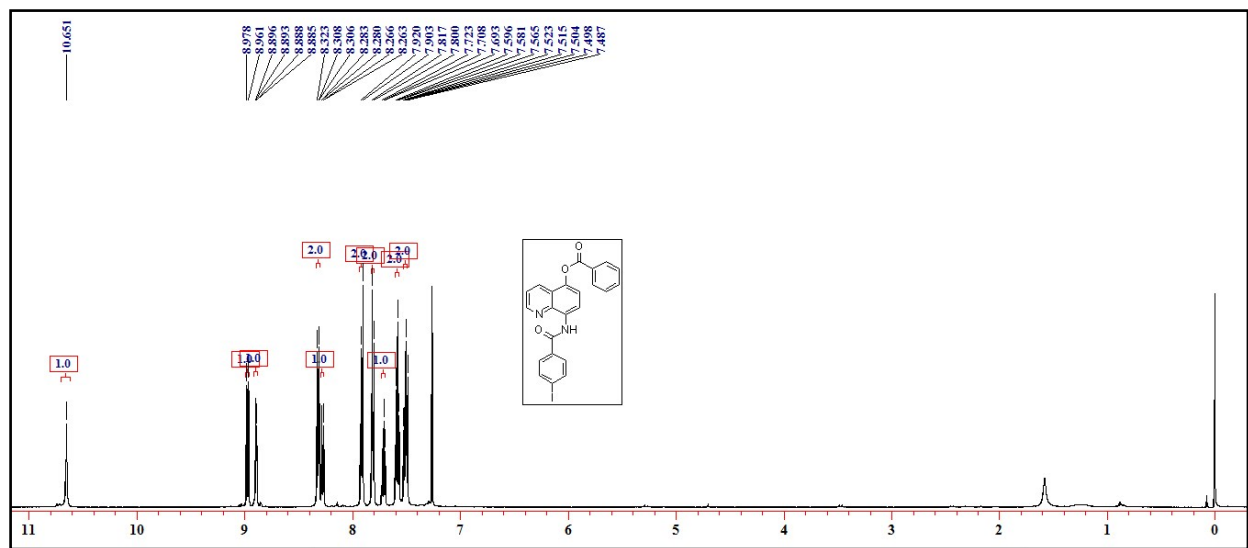

Figure S35. <sup>1</sup>H NMR spectrum of **2p** in CDCl<sub>3</sub>.

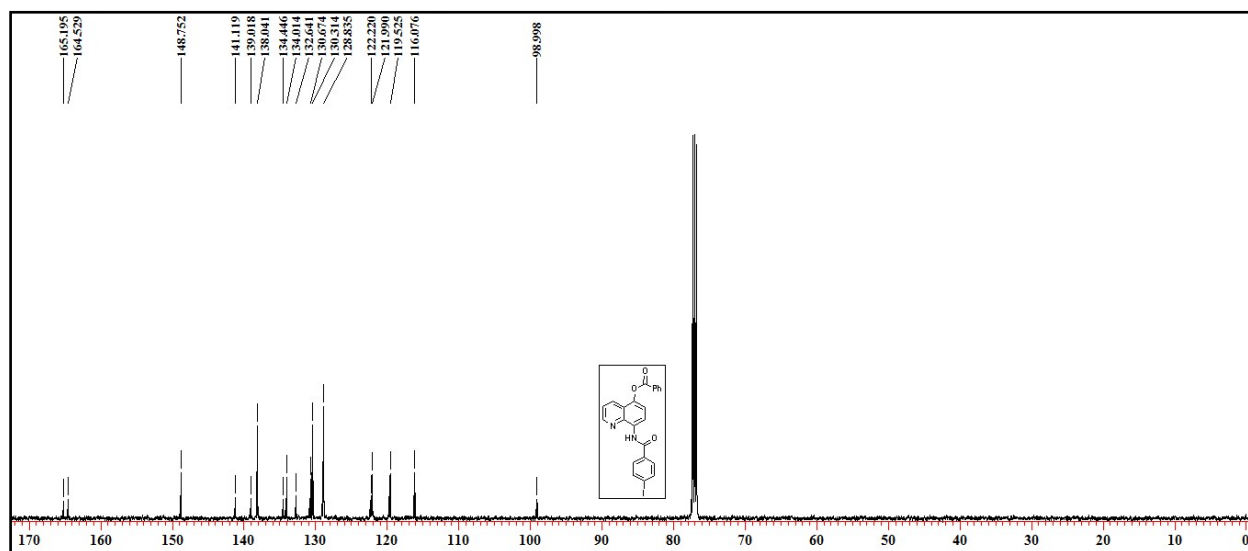

Figure S36. <sup>13</sup>C NMR spectrum of **2p** in CDCl<sub>3</sub>.

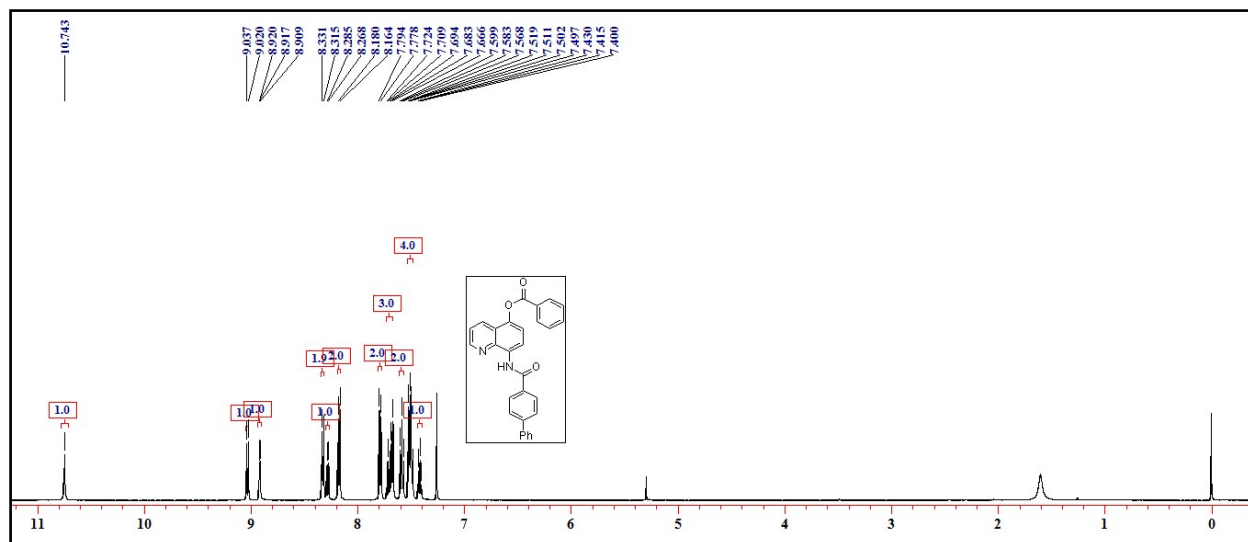

Figure S37. <sup>1</sup>H NMR spectrum of **2q** in CDCl<sub>3</sub> + CD<sub>2</sub>Cl<sub>2</sub>.

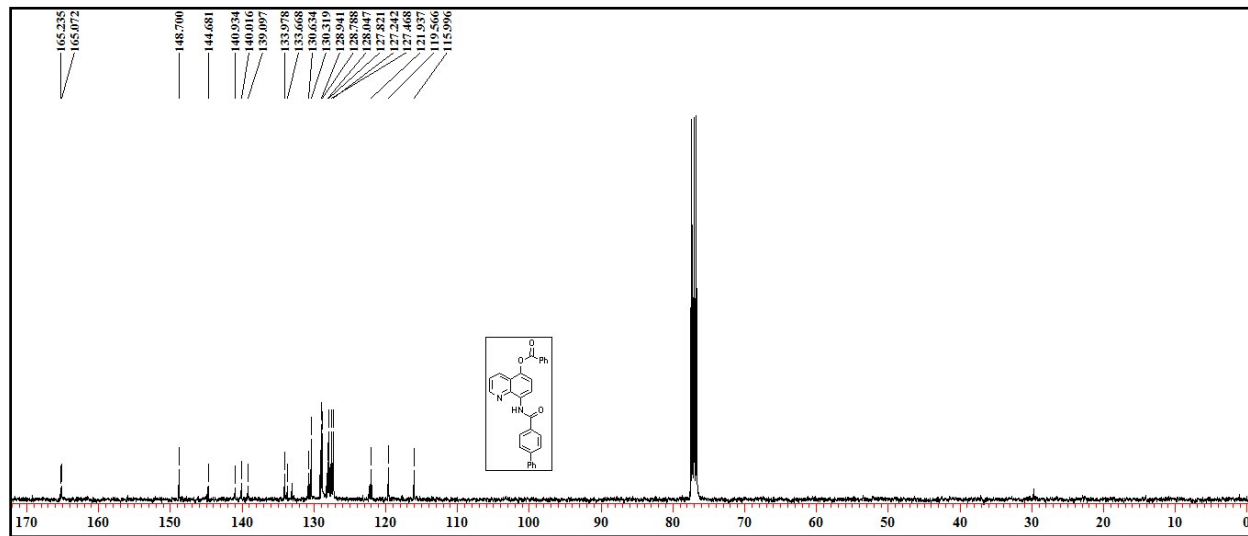

Figure S38. <sup>13</sup>C NMR spectrum of **2q** in CDCl<sub>3</sub>.

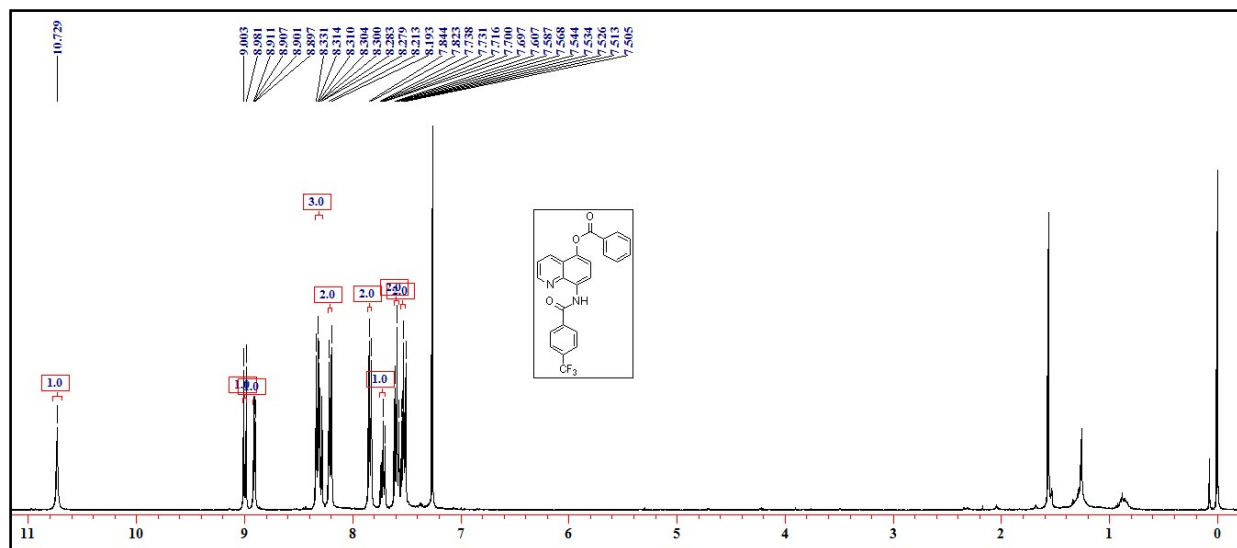

Figure S39. <sup>1</sup>H NMR spectrum of **2r** in CDCl<sub>3</sub>.

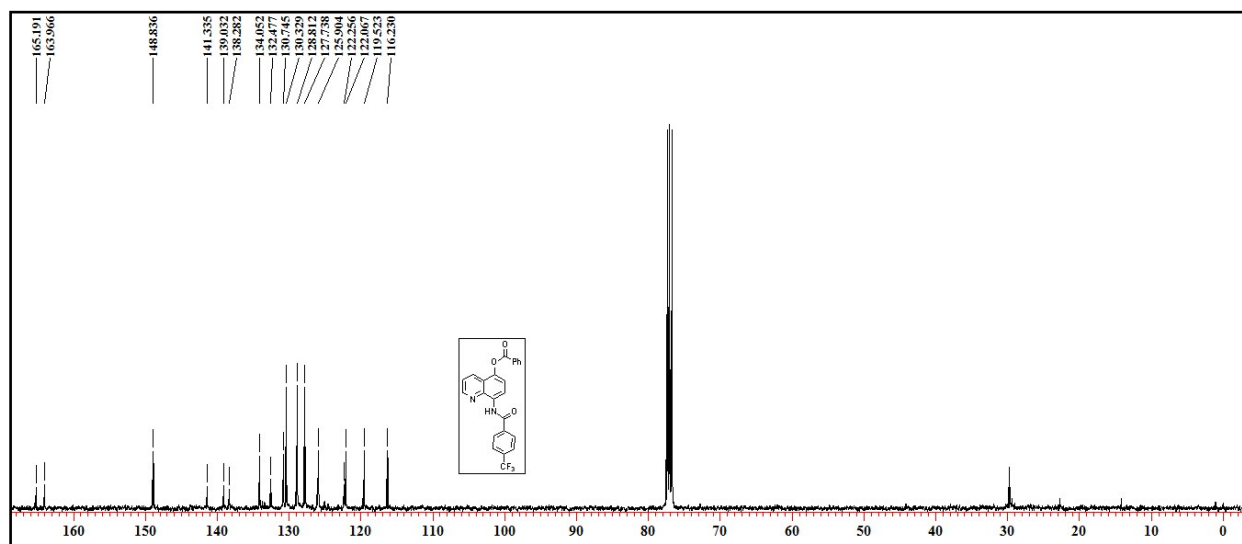

Figure S40. <sup>13</sup>C NMR spectrum of **2r** in CDCl<sub>3</sub>.

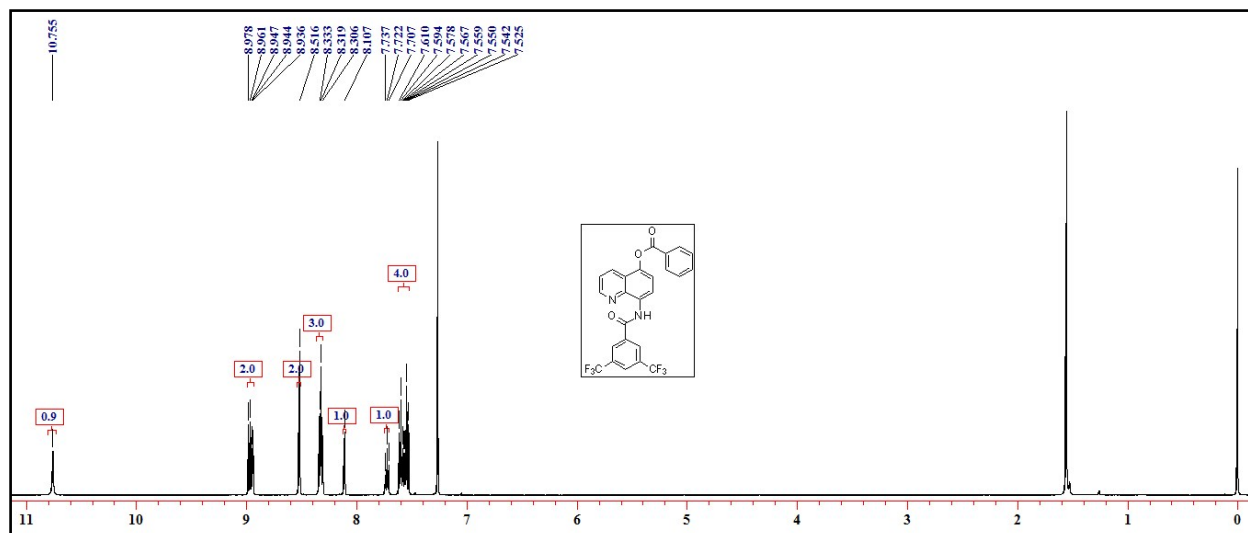

Figure S41. <sup>1</sup>H NMR spectrum of **2s** in CDCl<sub>3</sub>.

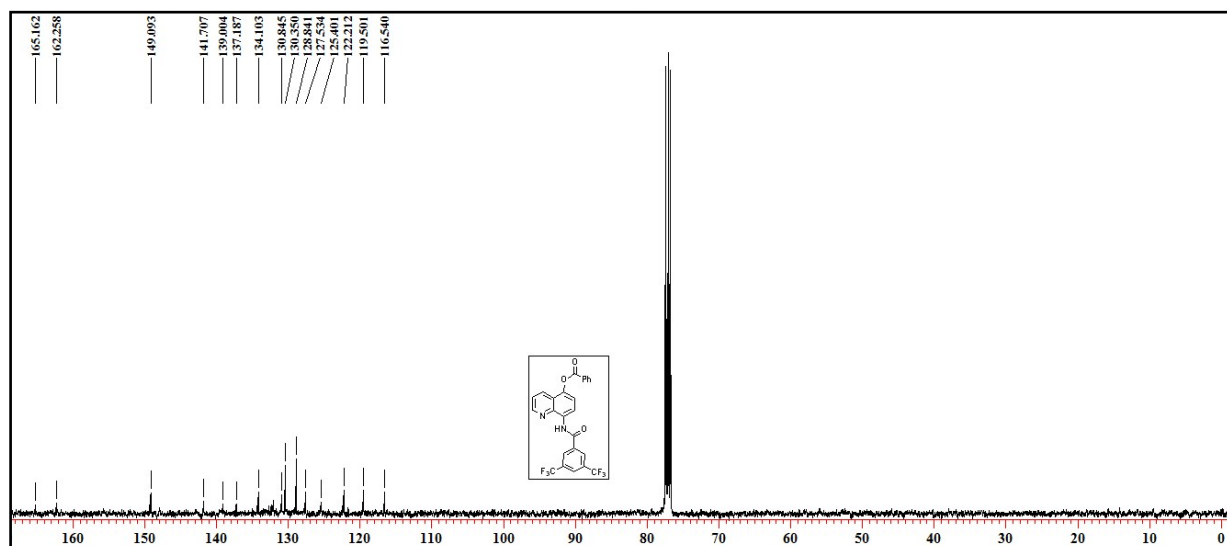

Figure S42. <sup>13</sup>C NMR spectrum of **2s** in CDCl<sub>3</sub>.

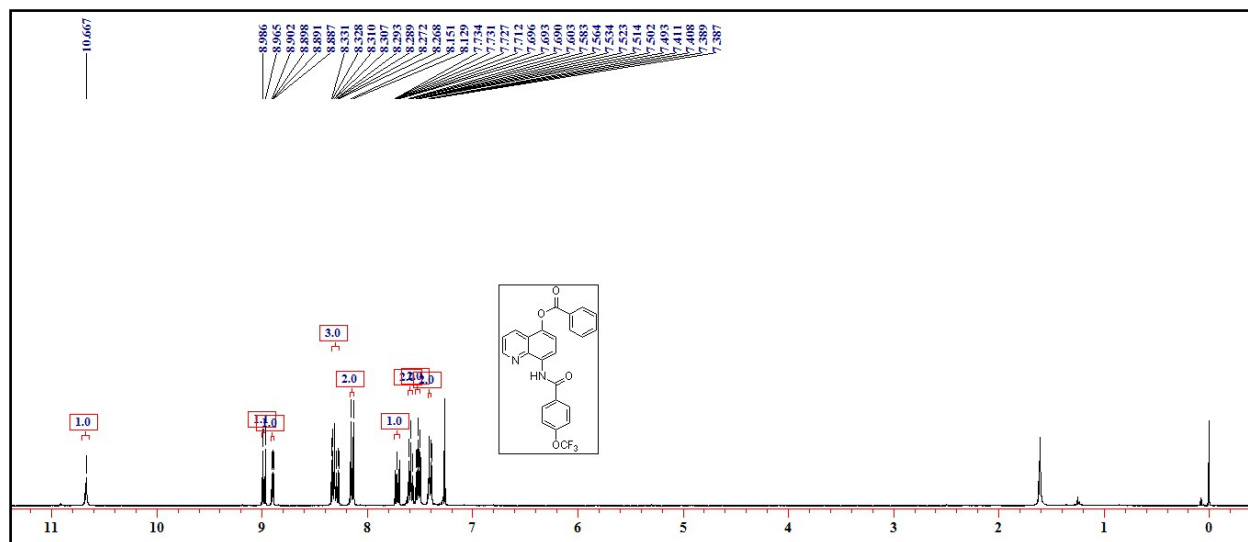

Figure S43. <sup>1</sup>H NMR spectrum of **2t** in CDCl<sub>3</sub>.

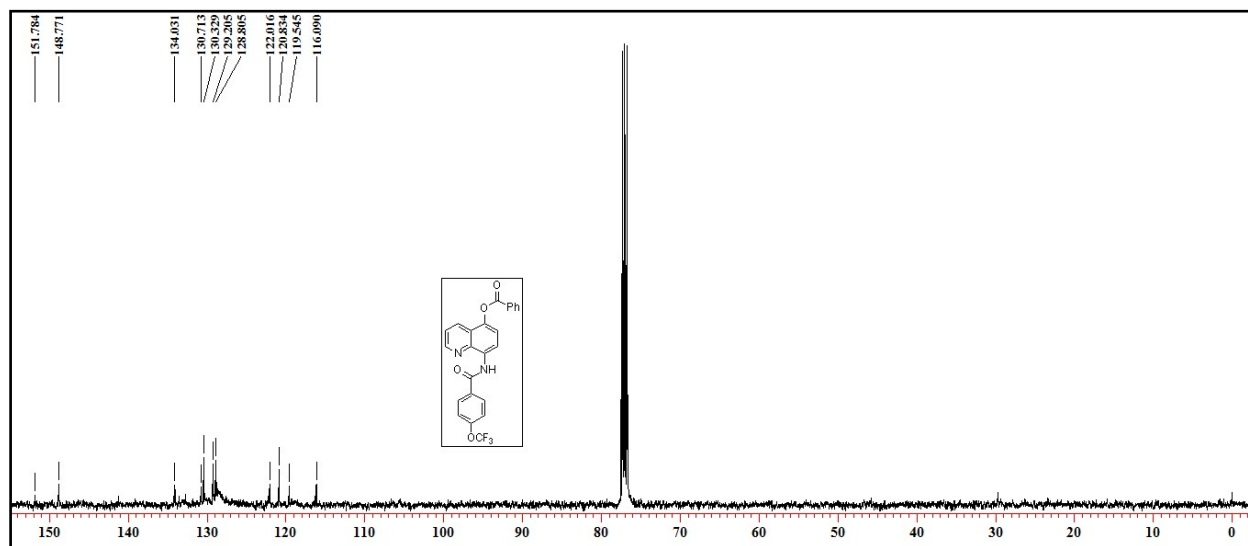

Figure S44. <sup>13</sup>C NMR spectrum of **2t** in CDCl<sub>3</sub>.

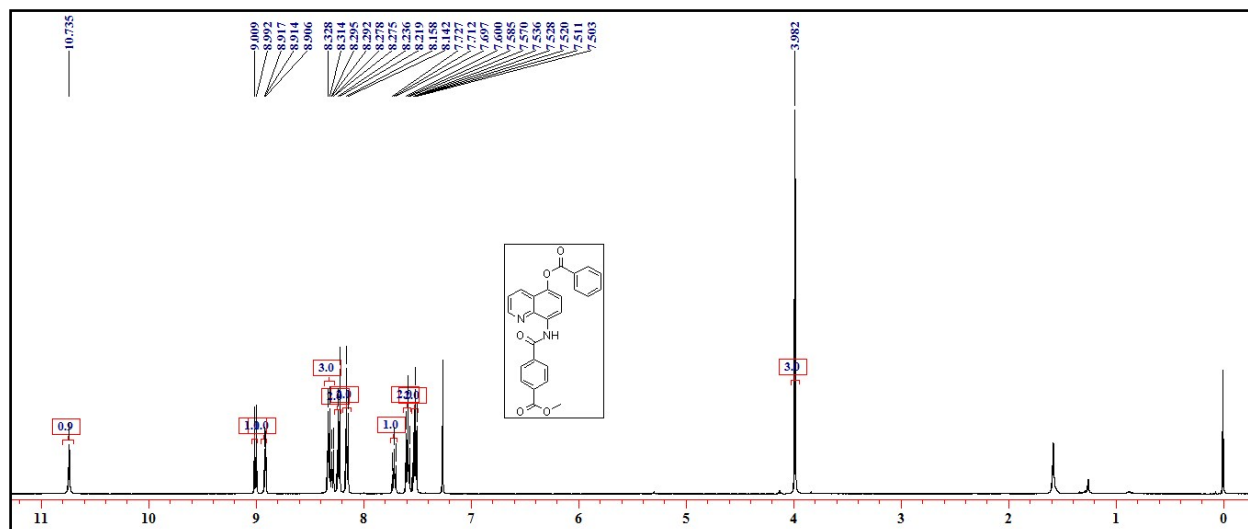

Figure S45. <sup>1</sup>H NMR spectrum of **2u** in CDCl<sub>3</sub>.

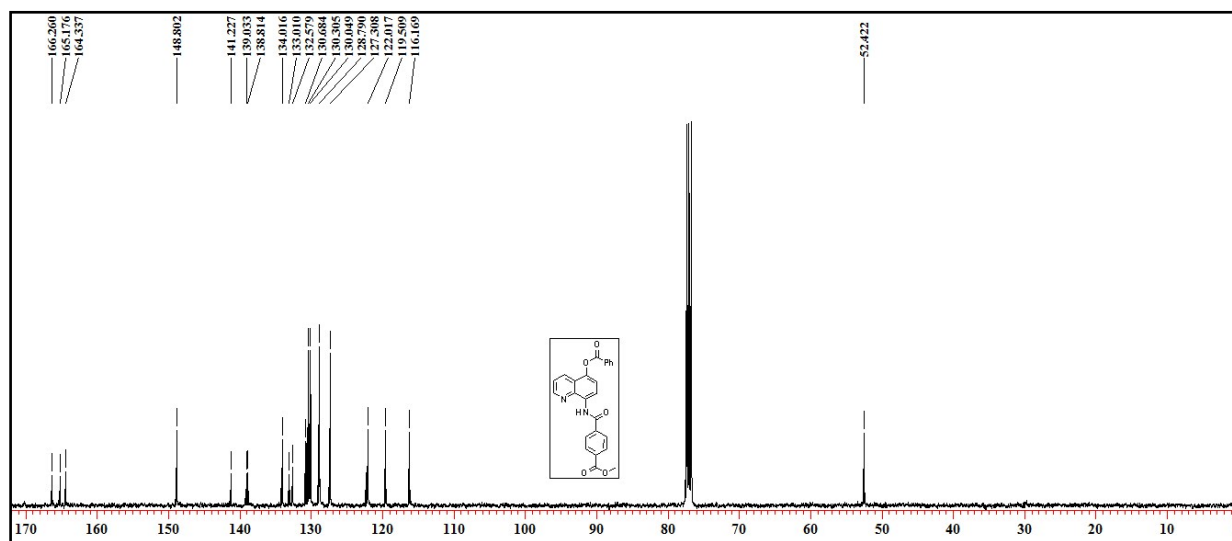

Figure S46. <sup>13</sup>C NMR spectrum of **2u** in CDCl<sub>3</sub>.

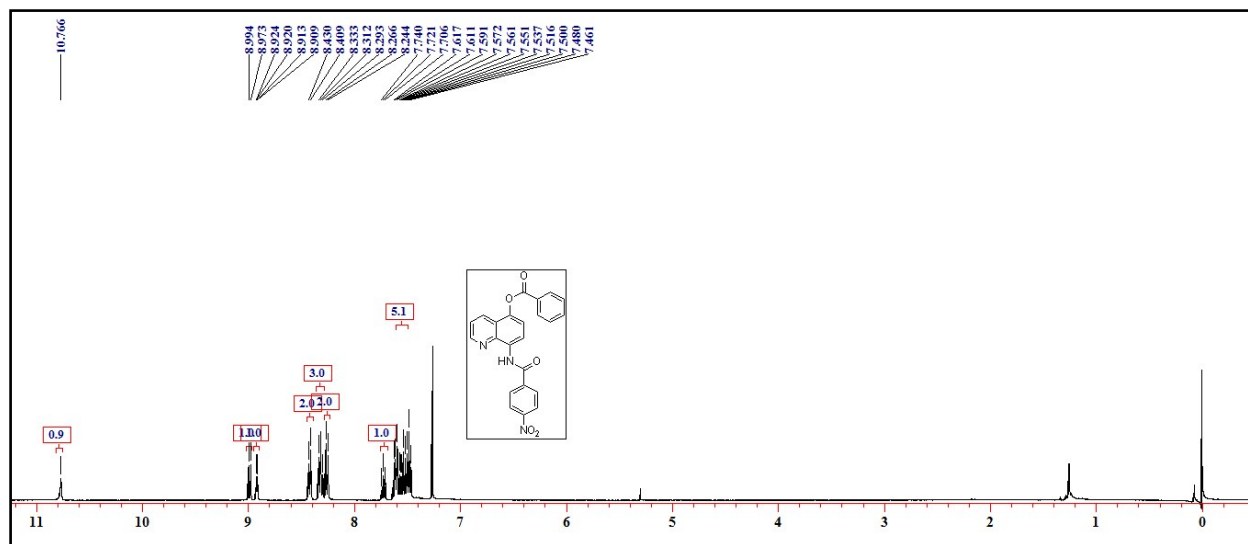

Figure S47. <sup>1</sup>H NMR spectrum of **2v** in CDCl<sub>3</sub>.

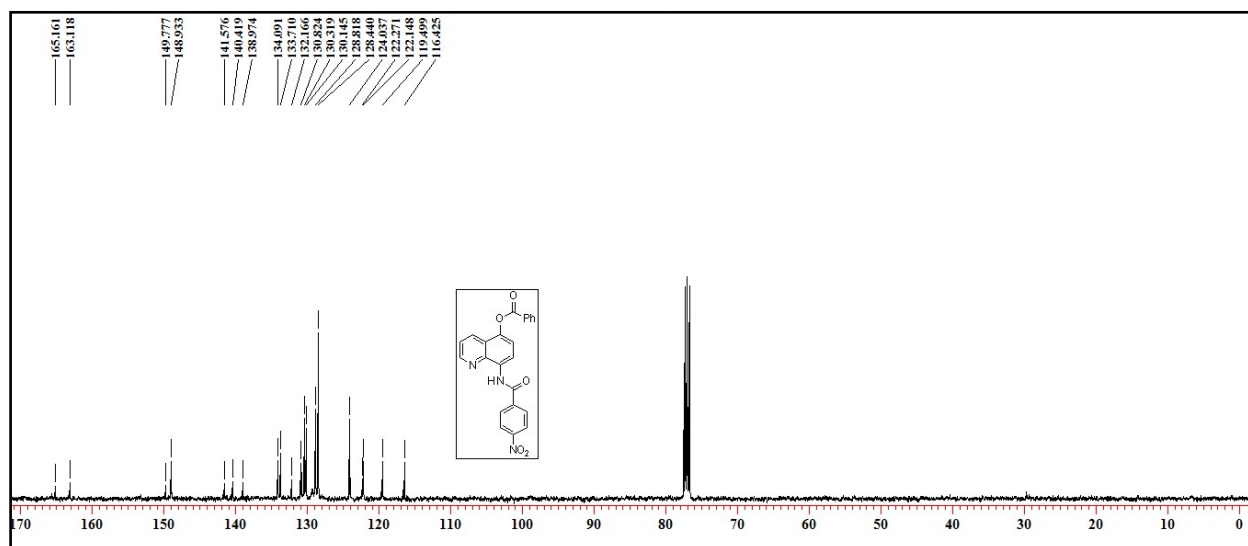

Figure S48. <sup>13</sup>C NMR spectrum of **2v** in CDCl<sub>3</sub>.



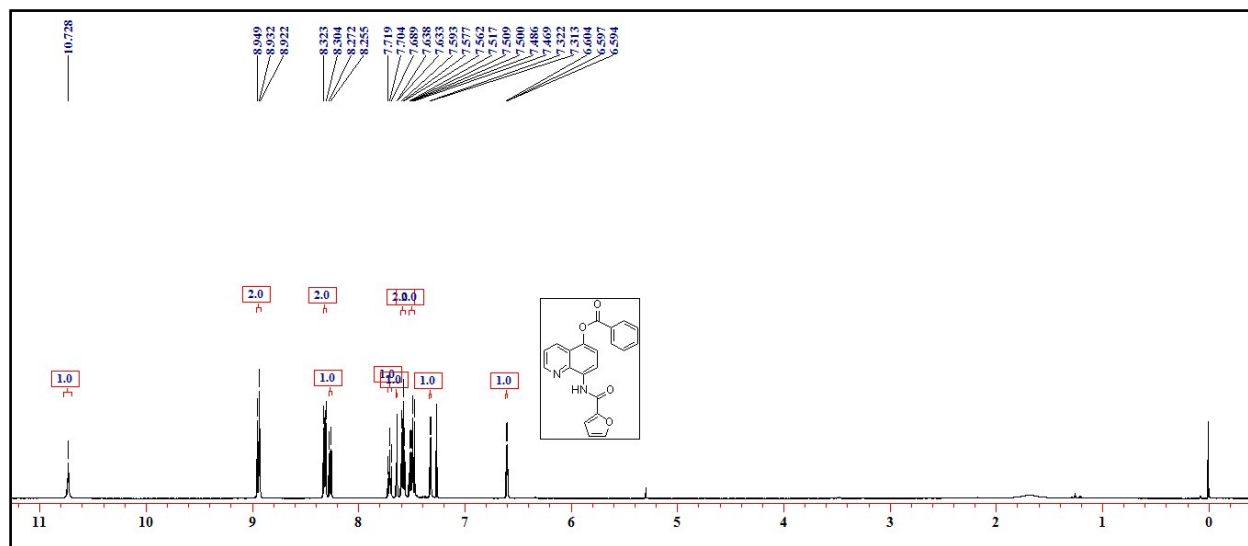

Figure S49. <sup>1</sup>H NMR spectrum of **2w** in CDCl<sub>3</sub> + CD<sub>2</sub>Cl<sub>2</sub>.

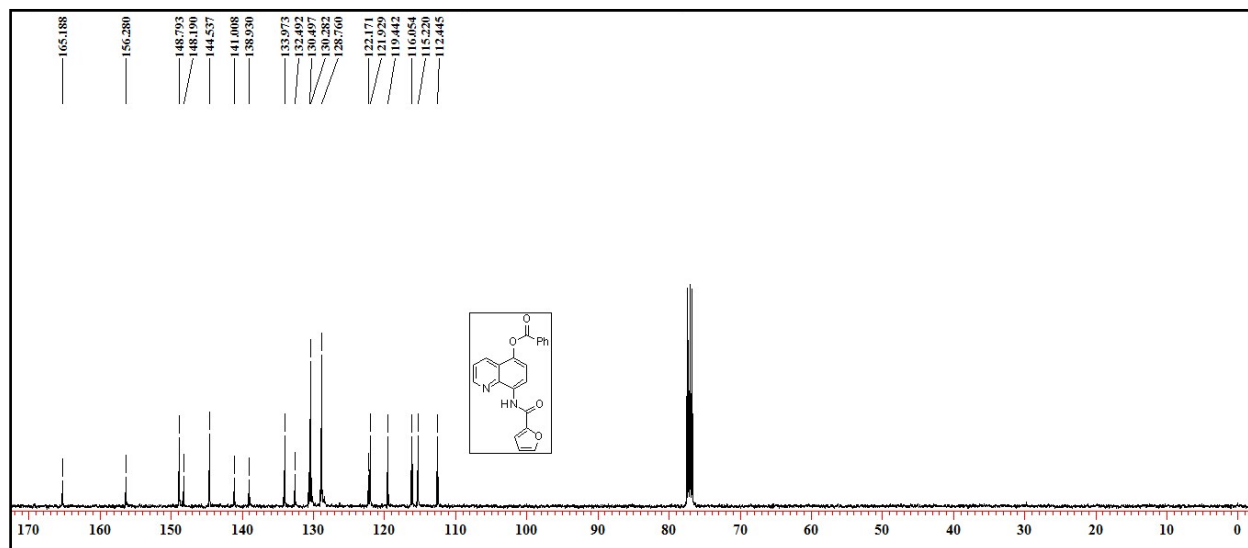

Figure S50. <sup>13</sup>C NMR spectrum of **2w** in CDCl<sub>3</sub>.

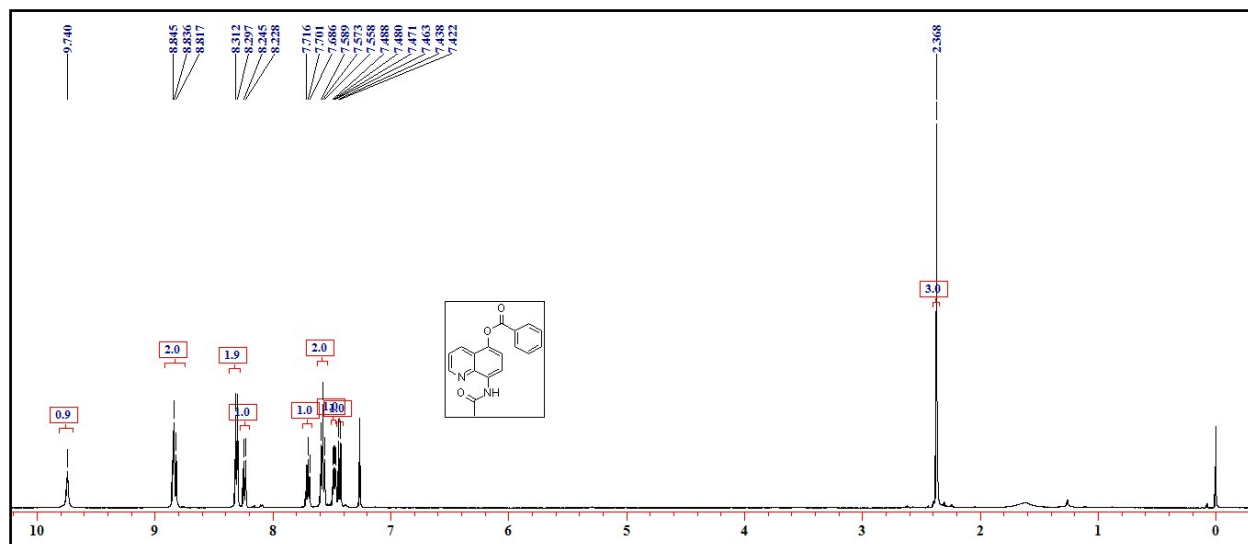

Figure S51. <sup>1</sup>H NMR spectrum of **2x** in CDCl<sub>3</sub>.

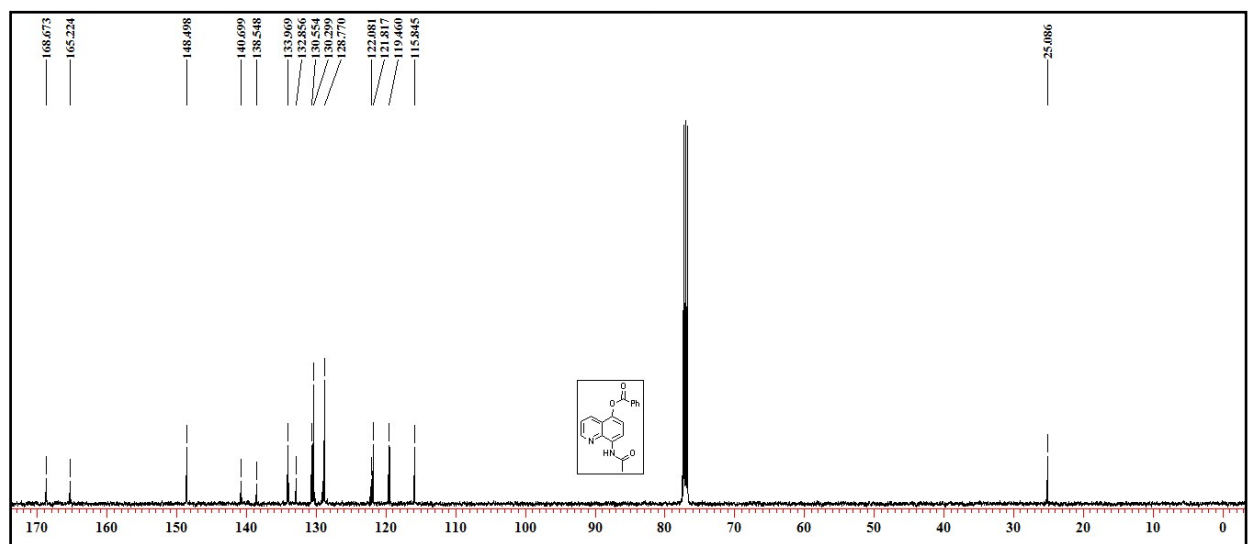

Figure S52. <sup>13</sup>C NMR spectrum of **2x** in CDCl<sub>3</sub>.

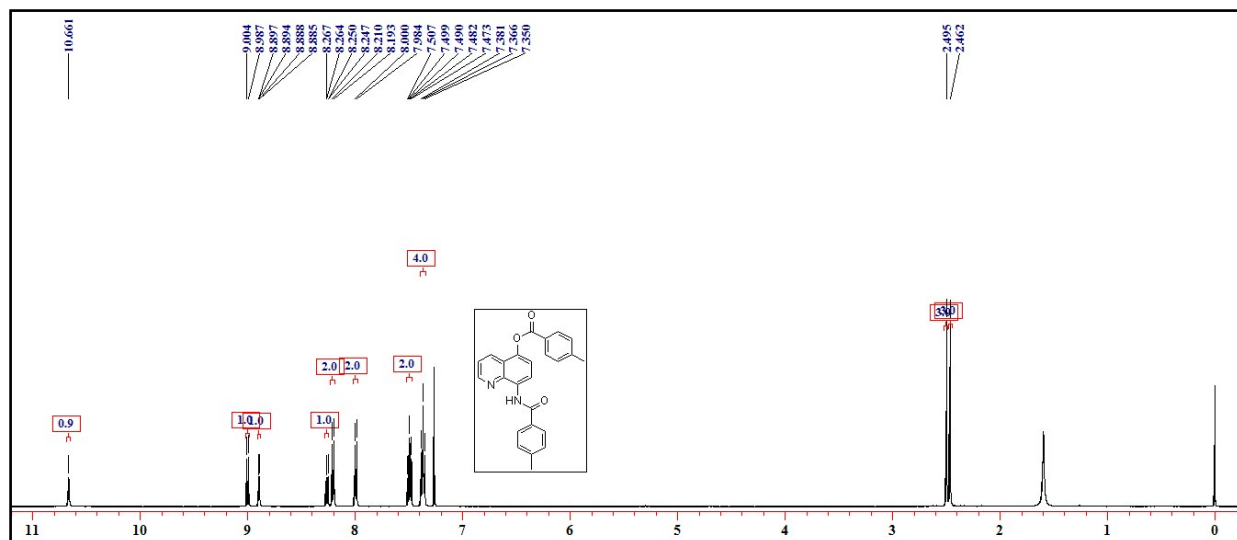

Figure S55. <sup>1</sup>H NMR spectrum of **3a** in CDCl<sub>3</sub>.

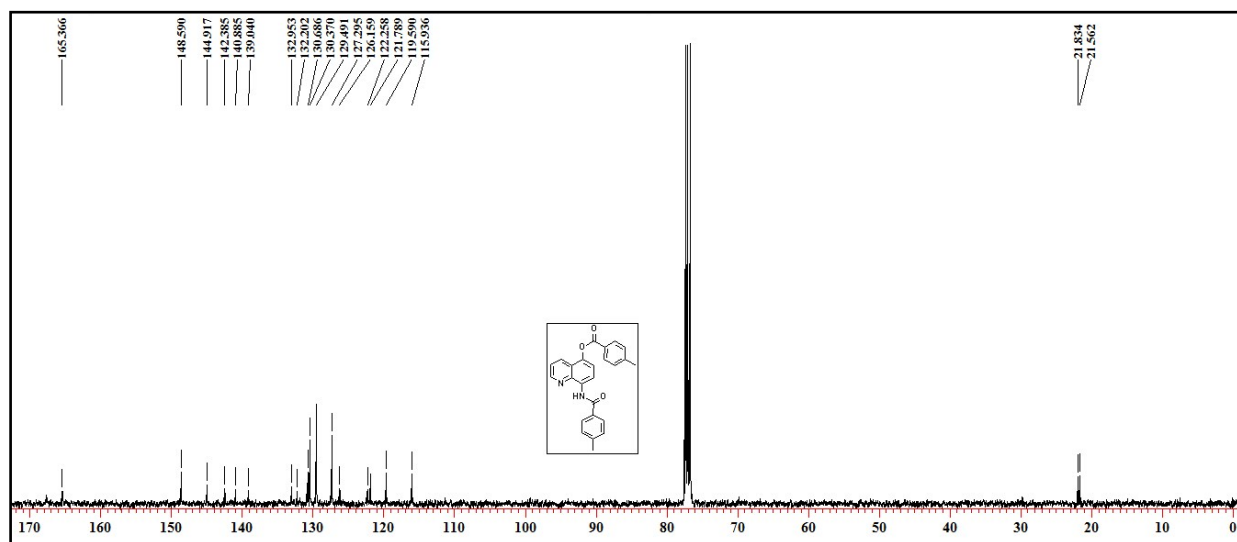

Figure S56. <sup>13</sup>C NMR spectrum of **3a** in CDCl<sub>3</sub>.

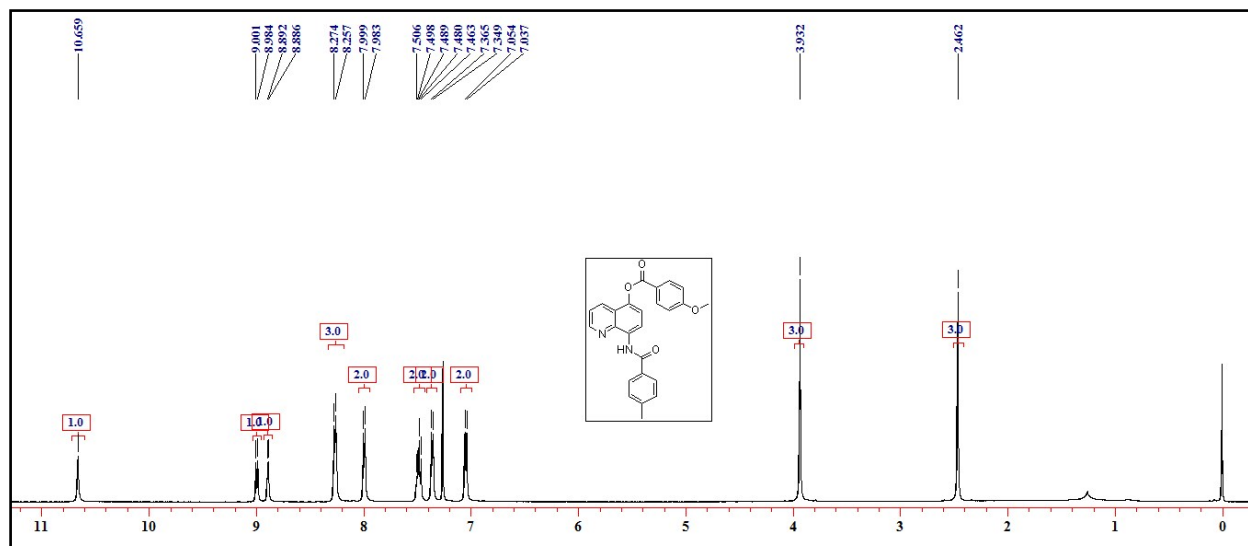

Figure S57.  $^1\text{H}$  NMR spectrum of **3b** in CDCl<sub>3</sub>.

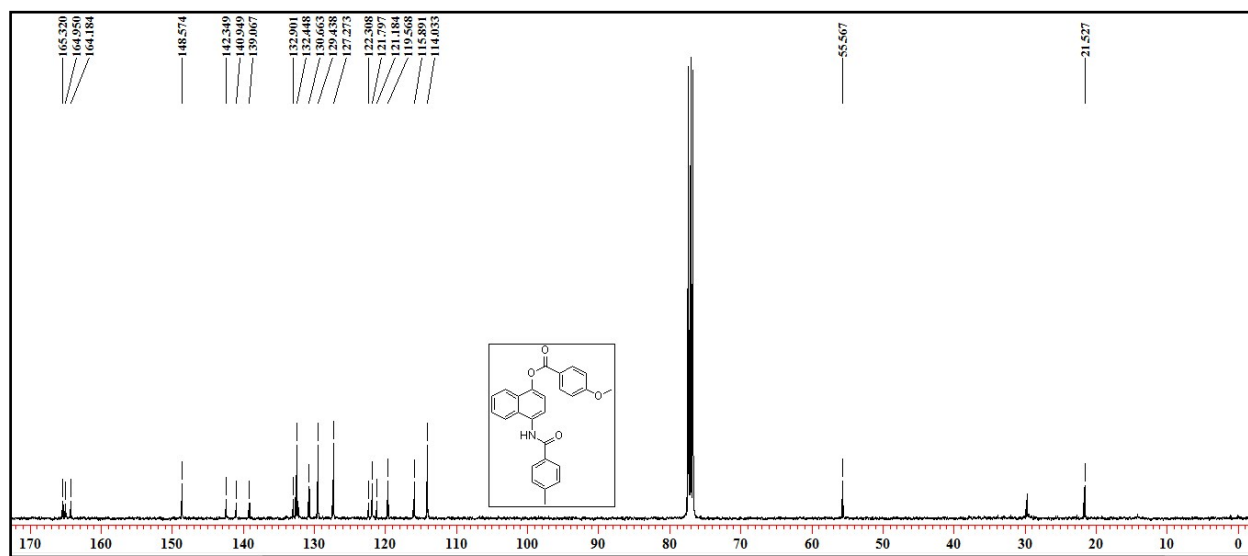

Figure S58.  $^{13}\text{C}$  NMR spectrum of **3b** in CDCl<sub>3</sub>.

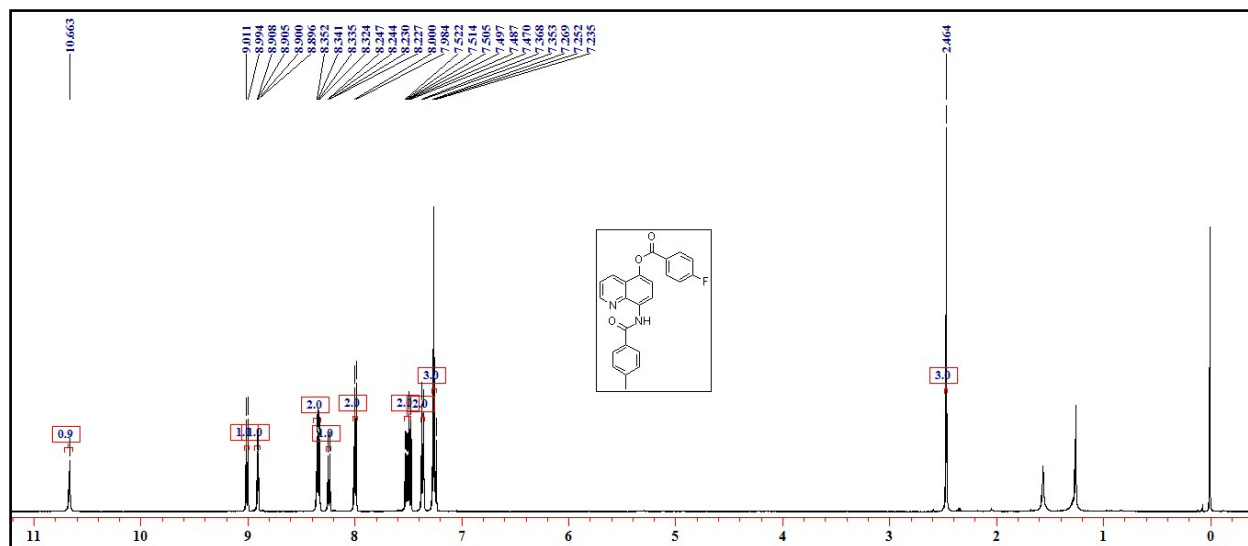

Figure S59.  $^1\text{H}$  NMR spectrum of **3c** in  $\text{CDCl}_3$ .

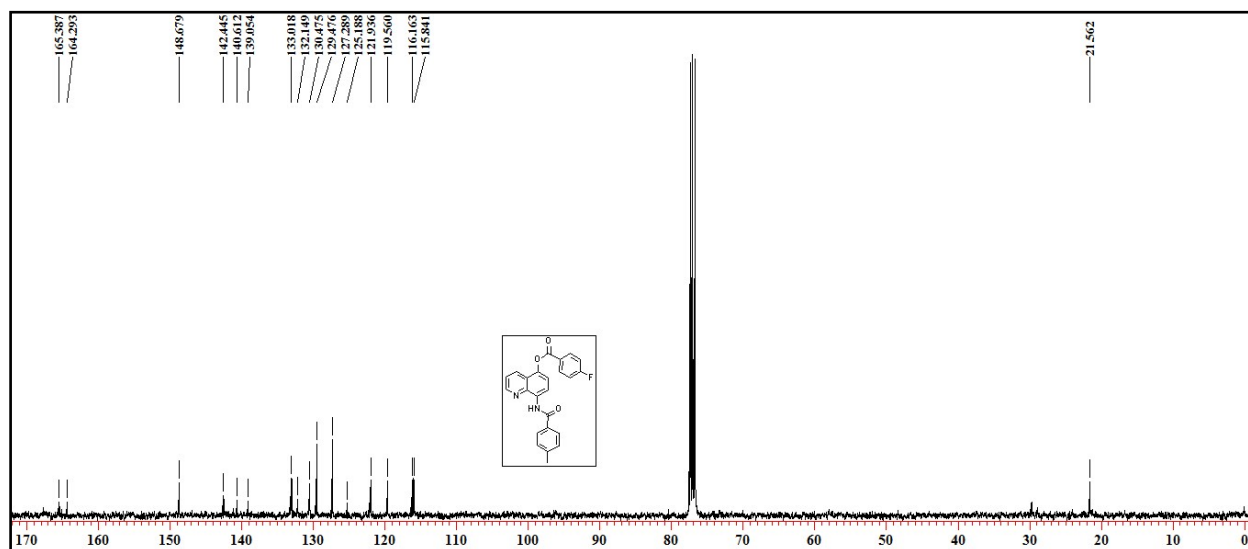

Figure S60.  $^{13}\text{C}$  NMR spectrum of **3c** in  $\text{CDCl}_3$

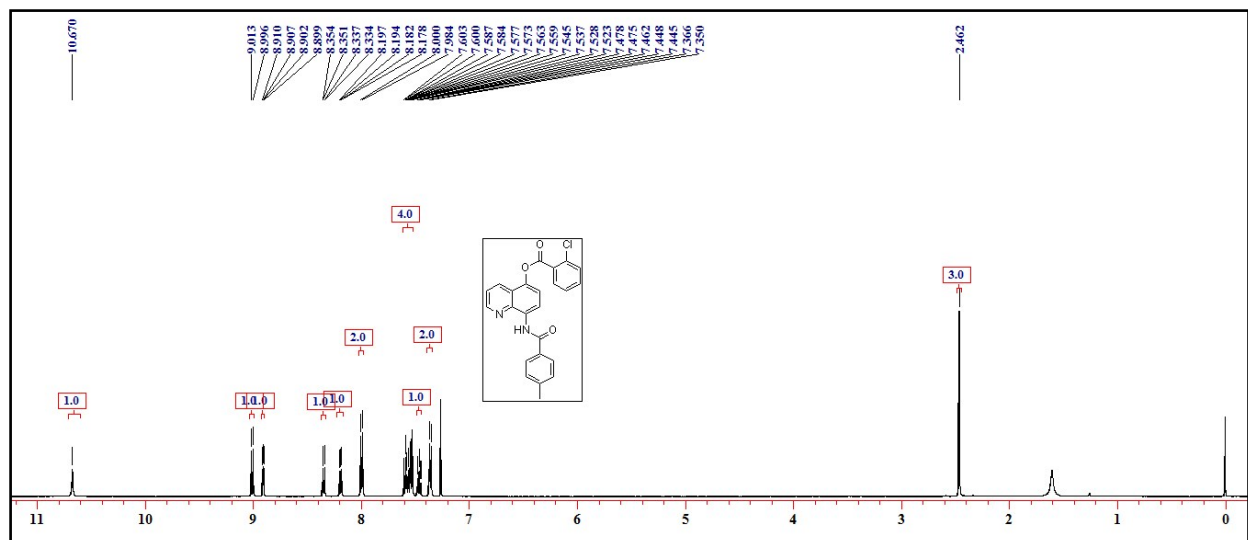

Figure S61. <sup>1</sup>H NMR spectrum of **3d** in CDCl<sub>3</sub>.

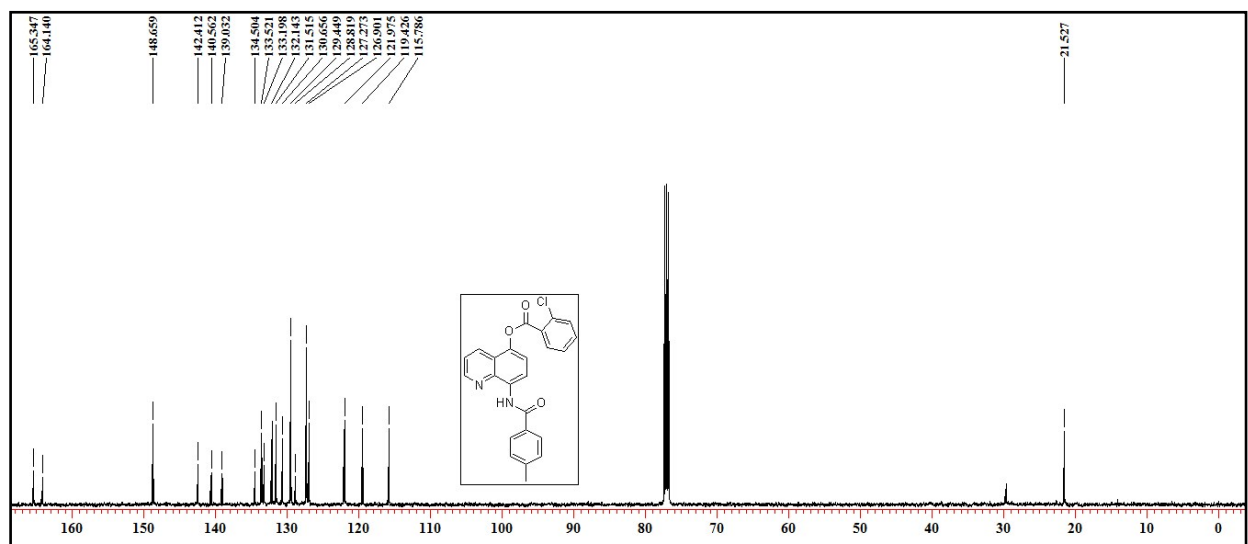

Figure S62. <sup>13</sup>C NMR spectrum of **3d** in CDCl<sub>3</sub>.

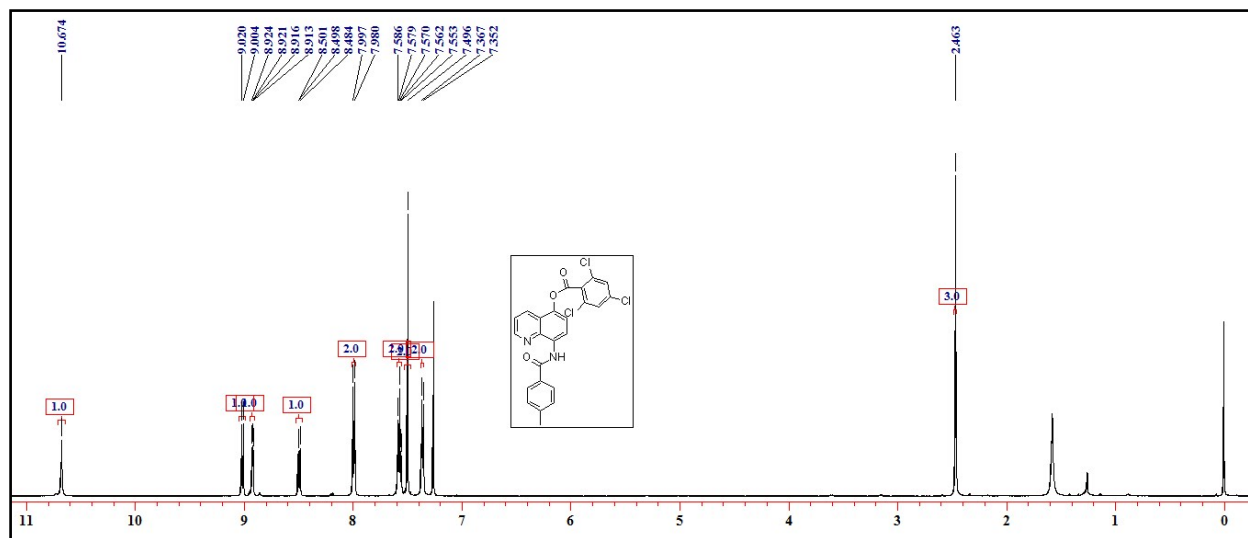

Figure S63. <sup>1</sup>H NMR spectrum of **3e** in CDCl<sub>3</sub>.

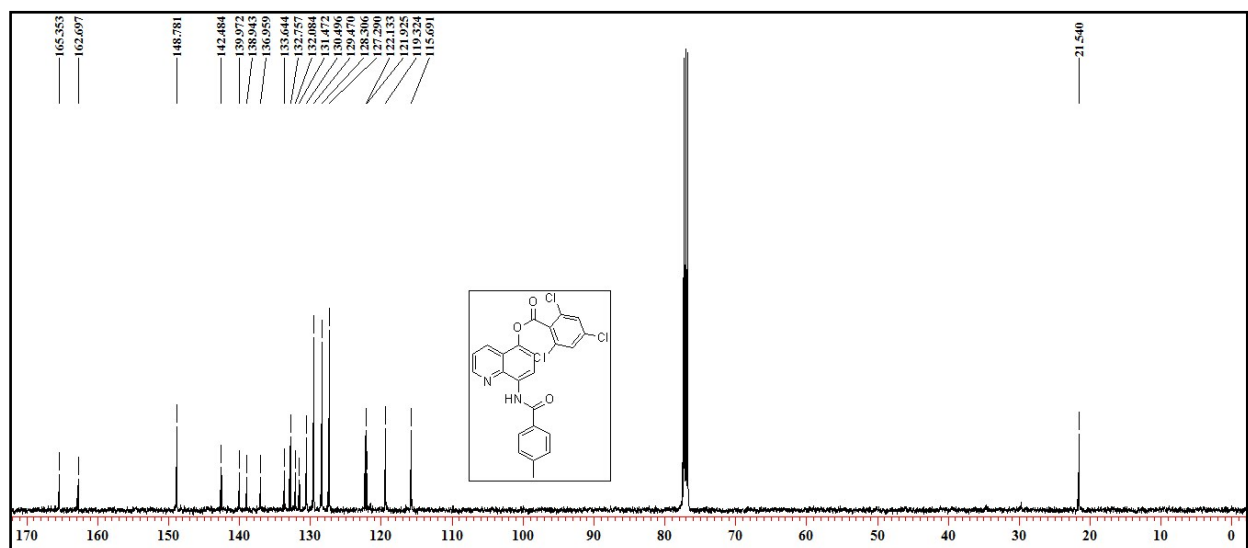

Figure S64. <sup>13</sup>C NMR spectrum of **3e** in CDCl<sub>3</sub>.

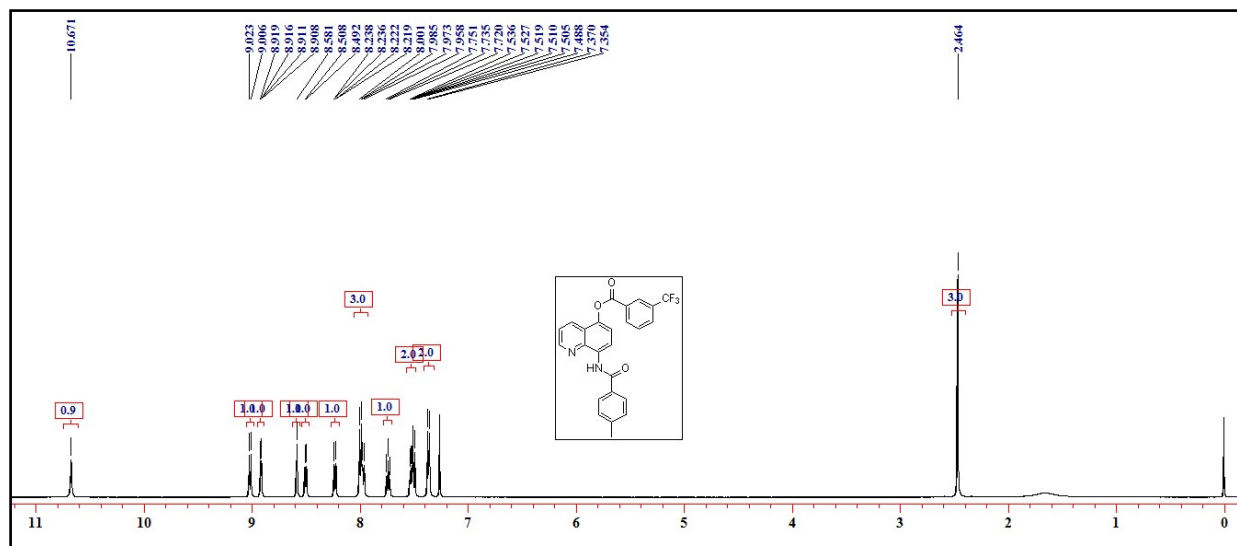

Figure S65. <sup>1</sup>H NMR spectrum of **3f** in CDCl<sub>3</sub>.

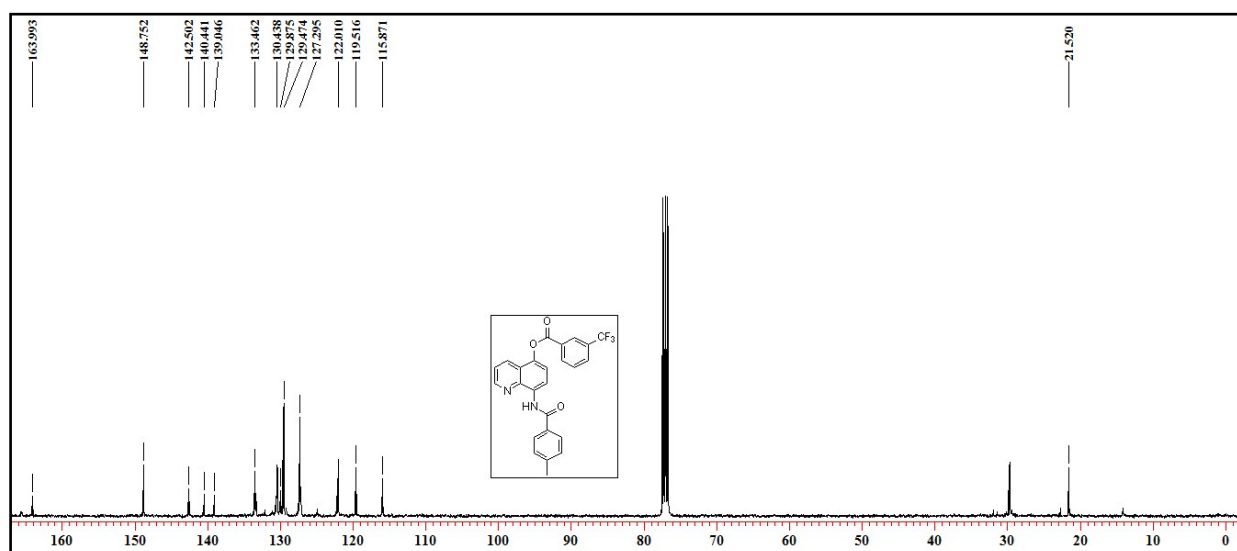

Figure S66. <sup>13</sup>C NMR spectrum of **3f** in CDCl<sub>3</sub>.



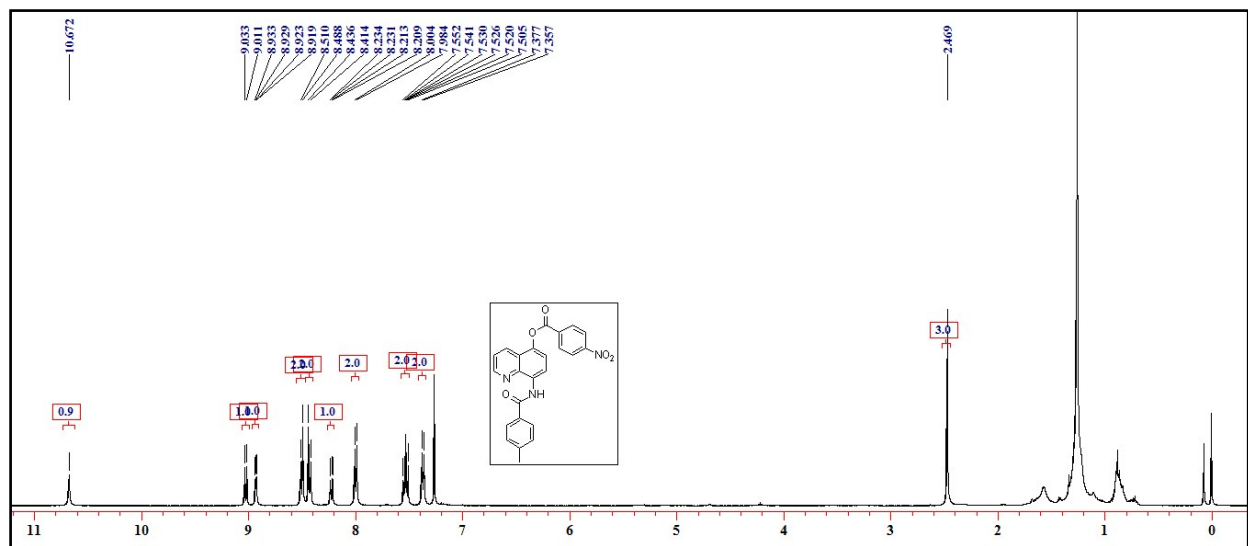

Figure S67. <sup>1</sup>H NMR spectrum of **3g** in CDCl<sub>3</sub>.

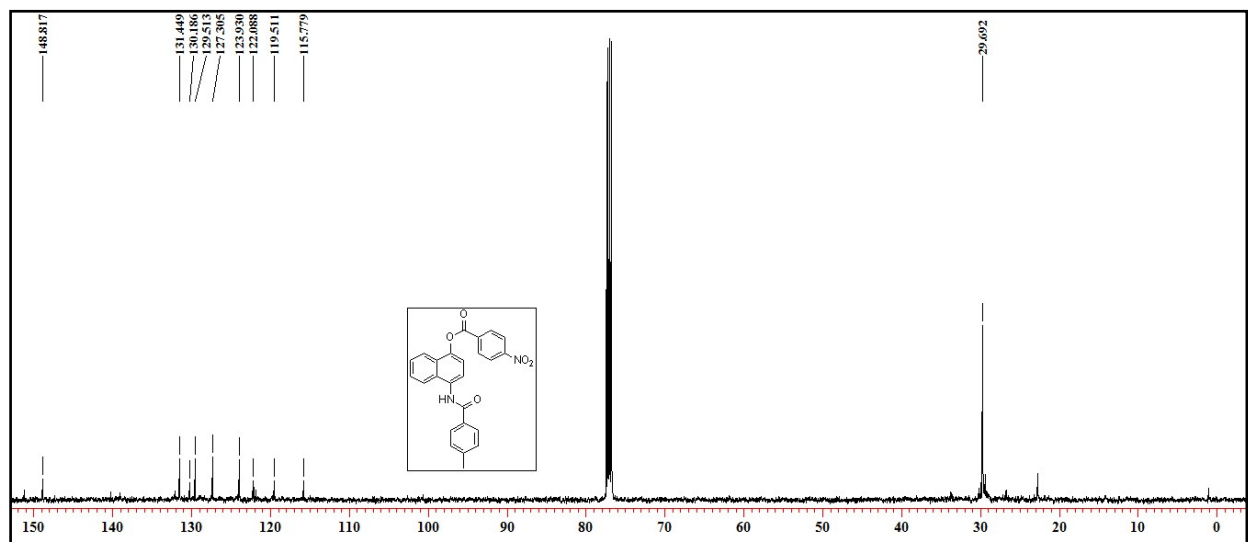

Figure S68. <sup>13</sup>C NMR spectrum of **3g** in CDCl<sub>3</sub>.

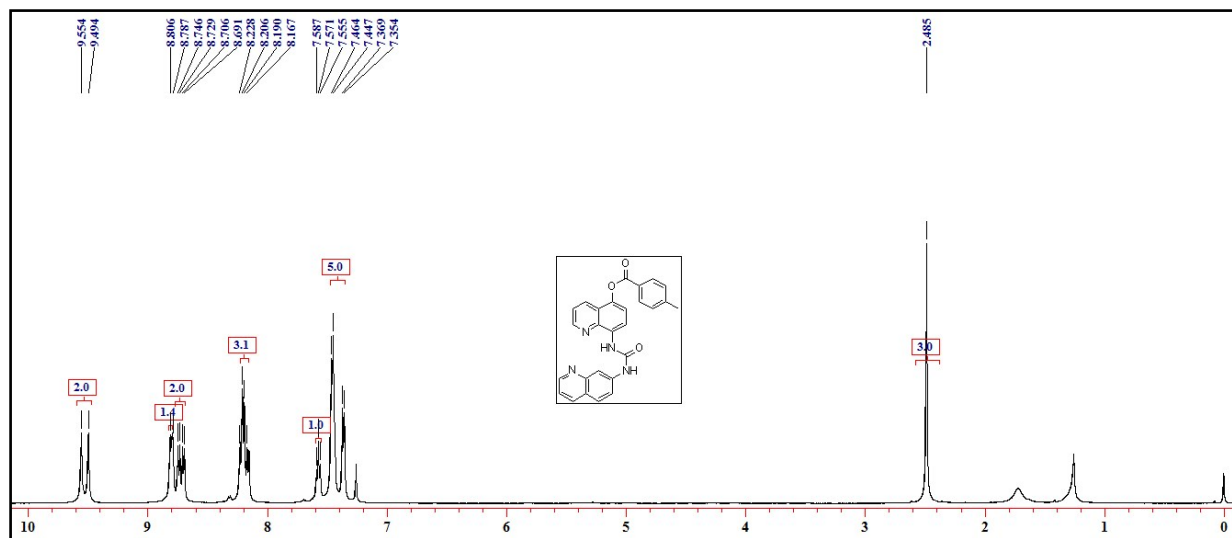

Figure S53. <sup>1</sup>H NMR spectrum of **3h** in CDCl<sub>3</sub>.

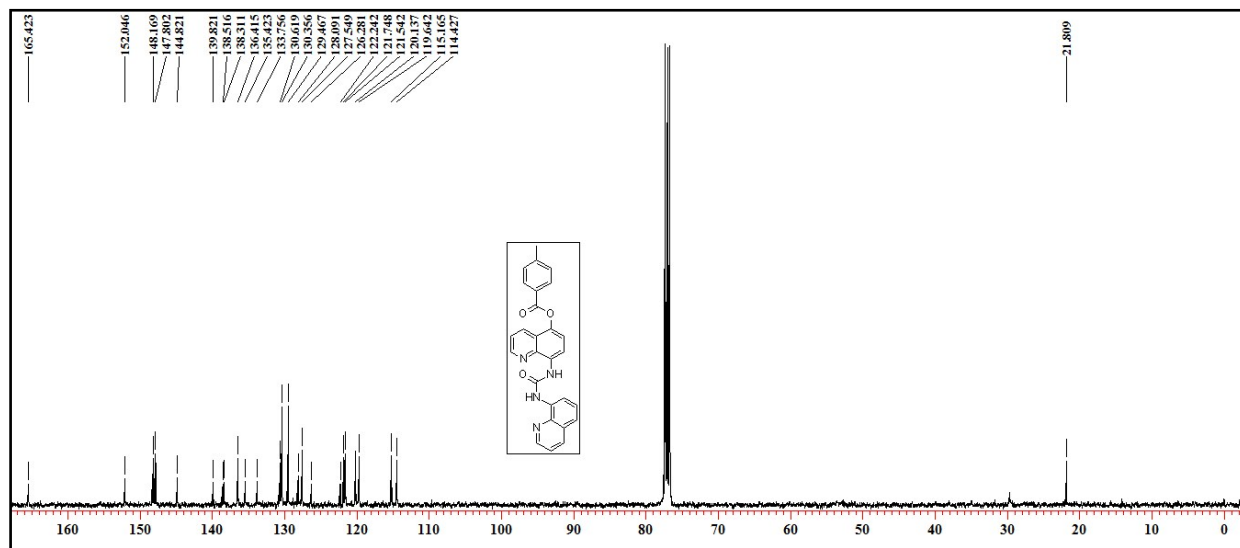

Figure S54. <sup>13</sup>C NMR spectrum of **3h** in CDCl<sub>3</sub>.
